# Supplementary material for: A reference genome for Nicotiana tabacum enables map-based cloning of homeologous loci implicated in nitrogen utilization efficiency
Source: PubMed Central journal article supplement (PMC5474855; doi:10.1186/s12864-017-3791-6), 2017-06-19
Supplement: 12864_2017_3791_MOESM1_ESM.pdf [file 12864_2017_3791_MOESM1_ESM.pdf]

**Supplementary Data 1 – Improvement of the tobacco genome assembly**

|                                    | <i>N. tabacum</i> (cv. K326) from this study |                 | <i>N. tabacum</i> (cv. TN90) from Sierra <i>et al.</i> , 2014 |                 |
|------------------------------------|----------------------------------------------|-----------------|---------------------------------------------------------------|-----------------|
|                                    | NGS                                          | Super-Scaffolds | NGS                                                           | Super-Scaffolds |
| <b>Number of contigs/scaffolds</b> | 1084432                                      | 2217            | 829882                                                        | 382373          |
| <b>Total length (Mb)</b>           | 4695                                         | 3,688           | 3719                                                          | 3719            |
| <b>Defined bases (Mb)</b>          | 4049                                         |                 | 3613                                                          | 3613            |
| <b>N50 length (Mb)</b>             | 0.28                                         | 2.17            | -                                                             | 0.39            |
| <b>Anchored sequence</b>           | -                                            | 2924            | -                                                             | 706             |

Comparison of genome assembly presented with previously best publicly available genome assembly for the cultivar TN90 (Sierra *et al.*, 2014).
