# Supplementary material for: A reference genome for Nicotiana tabacum enables map-based cloning of homeologous loci implicated in nitrogen utilization efficiency
Source: PubMed Central journal article supplement (PMC5474855; doi:10.1186/s12864-017-3791-6), 2017-06-19
Supplement: 12864_2017_3791_MOESM2_ESM.pdf [file 12864_2017_3791_MOESM2_ESM.pdf]

## Supplementary Data 2 - Table of repeat families identified in *N. tabacum* genome assembly

```

=====
file name: Nitab4.5_scf.fasta
sequences: 1084432
total length: 4694948798 bp (4049313390 bp excl N/X-runs)
GC level: 38.88 %
bases masked: 3147747850 bp ( 67.05 %)
=====

```

|                             | number of elements* | length occupied | percentage of sequence |
|-----------------------------|---------------------|-----------------|------------------------|
| SINEs:                      | 120259              | 18586975 bp     | 0.40 %                 |
| ALUs                        | 35605               | 6801681 bp      | 0.14 %                 |
| MIRs                        | 0                   | 0 bp            | 0.00 %                 |
| LINEs:                      | 179285              | 102406783 bp    | 2.18 %                 |
| LINE1                       | 34825               | 31044780 bp     | 0.66 %                 |
| LINE2                       | 5438                | 769720 bp       | 0.02 %                 |
| L3/CR1                      | 0                   | 0 bp            | 0.00 %                 |
| LTR elements:               | 2623836             | 2011947685 bp   | 42.85 %                |
| ERVL                        | 0                   | 0 bp            | 0.00 %                 |
| ERVL-MaLRs                  | 0                   | 0 bp            | 0.00 %                 |
| ERV_classI                  | 2571                | 1161543 bp      | 0.02 %                 |
| ERV_classII                 | 3751                | 330136 bp       | 0.01 %                 |
| DNA elements:               | 388442              | 123764351 bp    | 2.64 %                 |
| hAT-Charlie                 | 0                   | 0 bp            | 0.00 %                 |
| TcMar-Tigger                | 0                   | 0 bp            | 0.00 %                 |
| Unclassified:               | 2531206             | 863230291 bp    | 18.39 %                |
| Total interspersed repeats: |                     | 3119936085 bp   | 66.45 %                |
| Small RNA:                  | 52972               | 7887422 bp      | 0.17 %                 |
| Satellites:                 | 11836               | 11334626 bp     | 0.24 %                 |
| Simple repeats:             | 404843              | 25024792 bp     | 0.53 %                 |
| Low complexity:             | 76754               | 3815378 bp      | 0.08 %                 |

```
=====
```
