# Supplementary material for: A reference genome for Nicotiana tabacum enables map-based cloning of homeologous loci implicated in nitrogen utilization efficiency
Source: PubMed Central journal article supplement (PMC5474855; doi:10.1186/s12864-017-3791-6), 2017-06-19
Supplement: 12864_2017_3791_MOESM4_ESM.pdf [file 12864_2017_3791_MOESM4_ESM.pdf]

## Biological Process: level 2

## Gene Ontology Terms

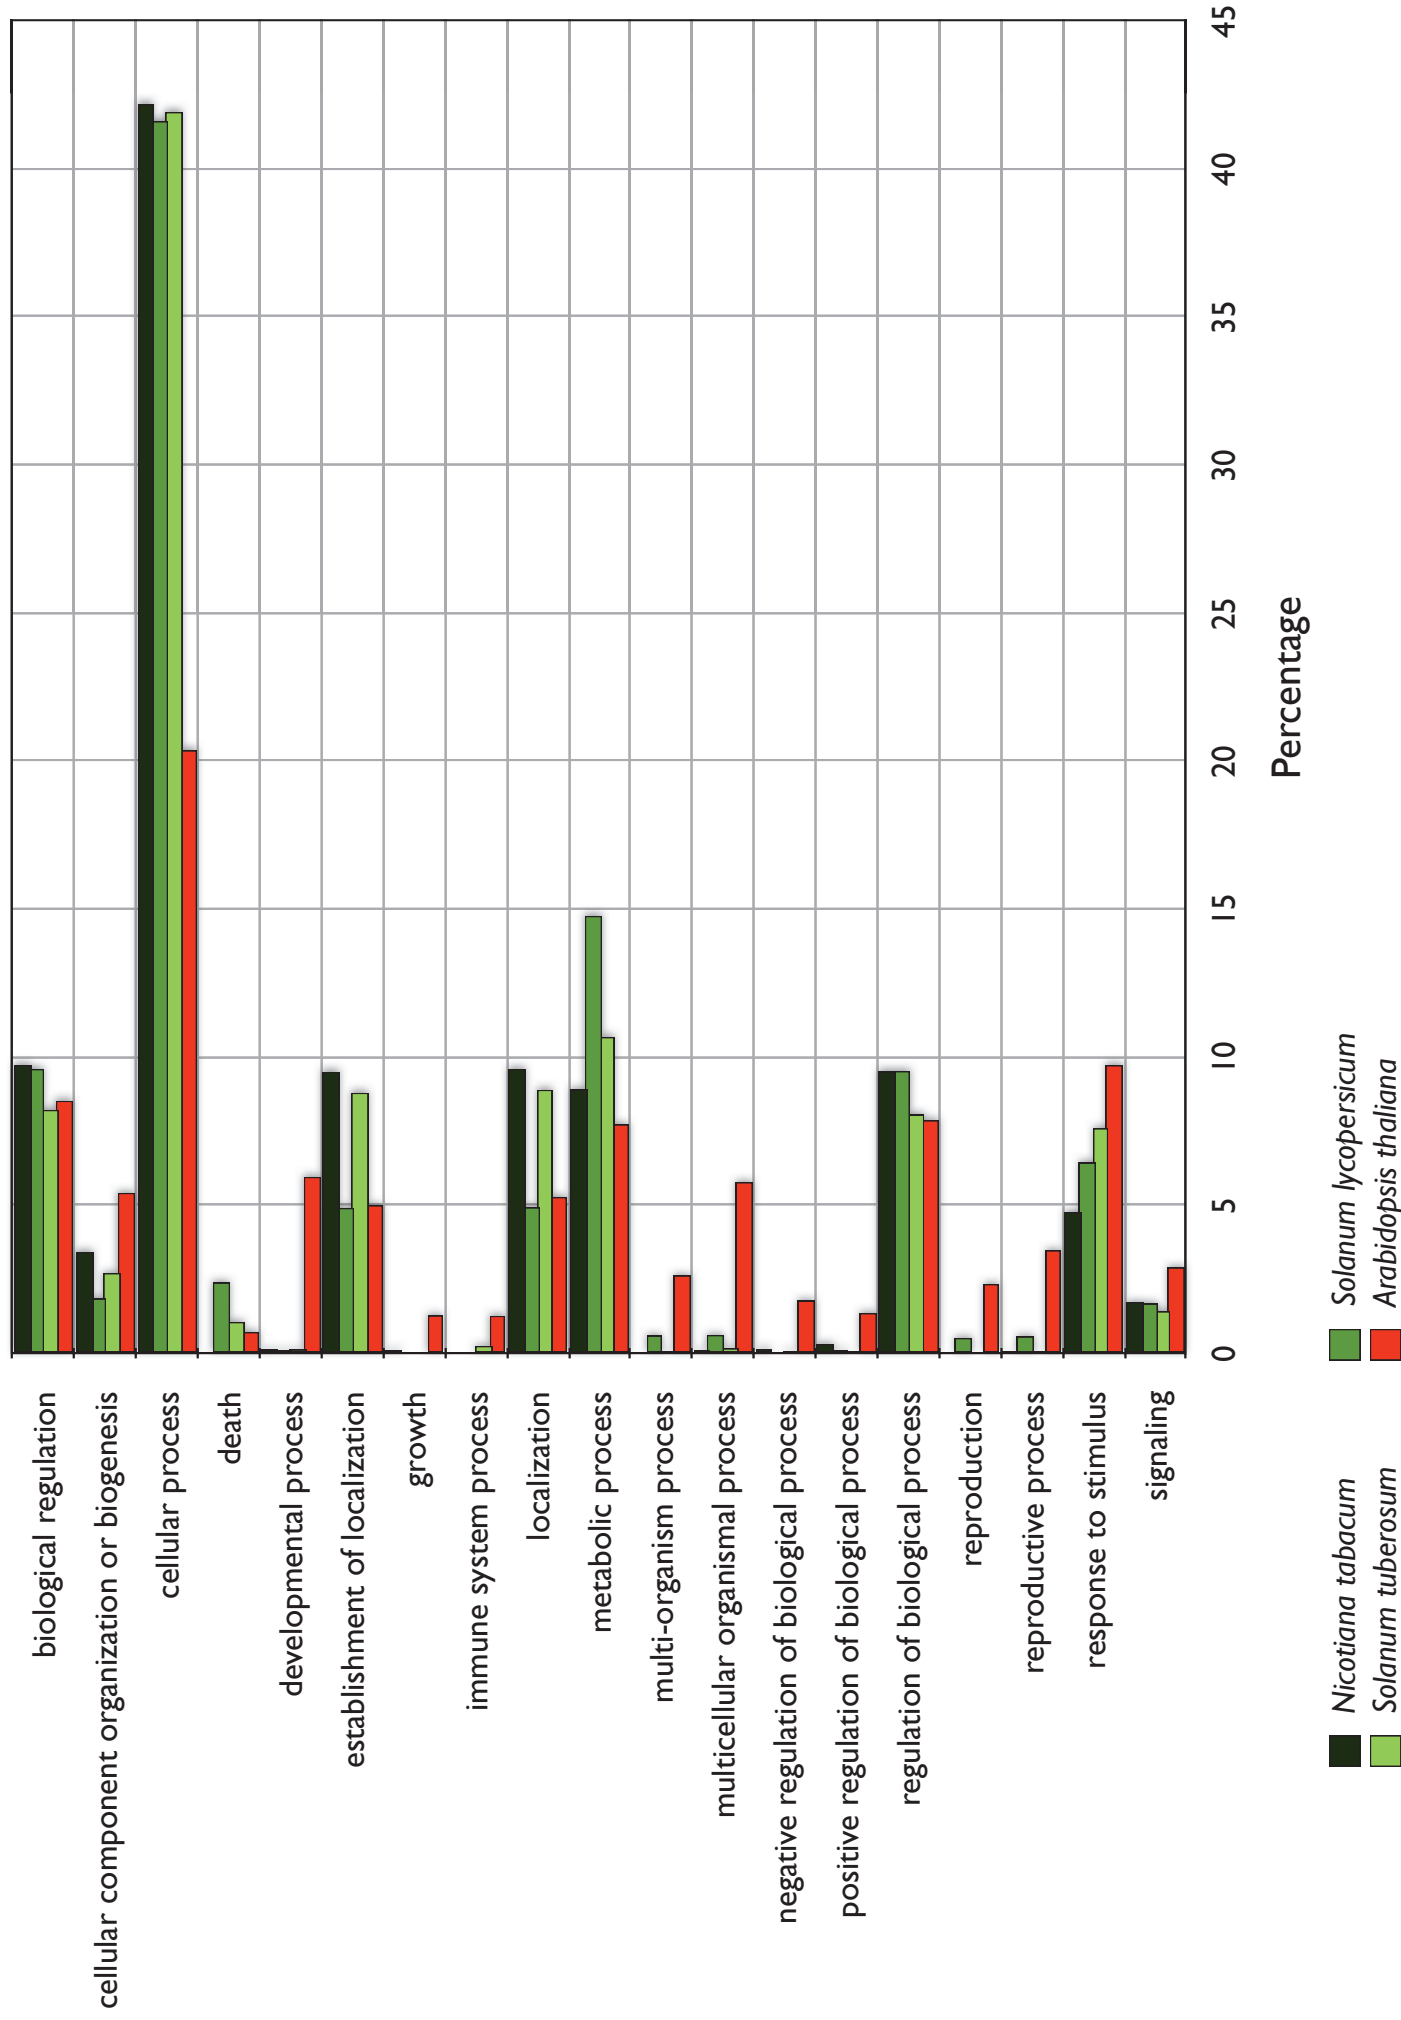

## Gene Ontology Terms Biological Process: level 2

### *Nicotiana tabacum*

| GO Terms                                      | #     | %     |
|-----------------------------------------------|-------|-------|
| biological regulation                         | 3114  | 9.71  |
| cellular component organization or biogenesis | 1094  | 3.41  |
| cellular process                              | 13520 | 42.16 |
| death                                         | 3     | 0.01  |
| developmental process                         | 34    | 0.11  |
| establishment of localization                 | 3044  | 9.49  |
| growth                                        | 31    | 0.10  |
| localization                                  | 3074  | 9.59  |
| metabolic process                             | 2850  | 8.89  |
| multi-organism process                        | 5     | 0.02  |
| multicellular organismal process              | 28    | 0.09  |
| negative regulation of biological process     | 42    | 0.13  |
| positive regulation of biological process     | 92    | 0.29  |
| regulation of biological process              | 3045  | 9.50  |
| reproduction                                  | 9     | 0.03  |
| reproductive process                          | 15    | 0.05  |
| response to stimulus                          | 1522  | 4.75  |
| signaling                                     | 547   | 1.71  |

### *Solanum tuberosum*

| GO Terms                                      | #    | %     |
|-----------------------------------------------|------|-------|
| biological regulation                         | 1247 | 8.20  |
| cell proliferation                            | 10   | 0.07  |
| cellular component organization or biogenesis | 409  | 2.69  |
| cellular process                              | 6371 | 41.89 |
| death                                         | 158  | 1.04  |
| developmental process                         | 17   | 0.11  |
| establishment of localization                 | 1336 | 8.78  |
| immune system process                         | 35   | 0.23  |
| localization                                  | 1350 | 8.88  |
| metabolic process                             | 1621 | 10.66 |
| multi-organism process                        | 9    | 0.06  |
| multicellular organismal process              | 23   | 0.15  |
| negative regulation of biological process     | 10   | 0.07  |
| regulation of biological process              | 1223 | 8.04  |
| reproductive process                          | 7    | 0.05  |
| response to stimulus                          | 1153 | 7.58  |
| signaling                                     | 213  | 1.40  |

### *Solanum lycopersicum*

| GO Terms                                      | #    | %     |
|-----------------------------------------------|------|-------|
| biological regulation                         | 1019 | 9.58  |
| cellular component organization or biogenesis | 195  | 1.83  |
| cellular process                              | 4422 | 41.58 |
| death                                         | 252  | 2.37  |
| developmental process                         |      | 0.08  |
| establishment of localization                 | 520  | 4.89  |
| localization                                  | 522  | 4.91  |
| metabolic process                             | 1568 | 14.75 |
| multi-organism process                        | 62   | 0.58  |
| multicellular organismal process              | 64   | 0.60  |
| positive regulation of biological process     | 11   | 0.10  |
| regulation of biological process              | 1011 | 9.51  |
| reproduction                                  | 53   | 0.50  |
| reproductive process                          | 59   | 0.55  |
| response to stimulus                          | 683  | 6.42  |
| signaling                                     | 176  | 1.66  |

### *Arabidopsis thaliana*

| GO Terms                                      | #     | %     |
|-----------------------------------------------|-------|-------|
| biological adhesion                           | 97    | 0.13  |
| biological regulation                         | 6168  | 8.51  |
| cell proliferation                            | 271   | 0.37  |
| cellular component organization or biogenesis | 3914  | 5.40  |
| cellular process                              | 14741 | 20.34 |
| death                                         | 504   | 0.70  |
| developmental process                         | 4303  | 5.94  |
| establishment of localization                 | 3606  | 4.98  |
| growth                                        | 911   | 1.26  |
| immune system process                         | 903   | 1.25  |
| localization                                  | 3812  | 5.26  |
| metabolic process                             | 5588  | 7.71  |
| multi-organism process                        | 1891  | 2.61  |
| multicellular organismal process              | 4175  | 5.76  |
| negative regulation of biological process     | 1274  | 1.76  |
| pigmentation                                  | 113   | 0.16  |
| positive regulation of biological process     | 970   | 1.34  |
| regulation of biological process              | 5690  | 7.85  |
| reproduction                                  | 1681  | 2.32  |
| reproductive process                          | 2507  | 3.46  |
| response to stimulus                          | 7041  | 9.71  |
| rhythmic process                              | 169   | 0.23  |
| signaling                                     | 2090  | 2.88  |

# Gene Ontology Terms

## Cellular Component: level 2

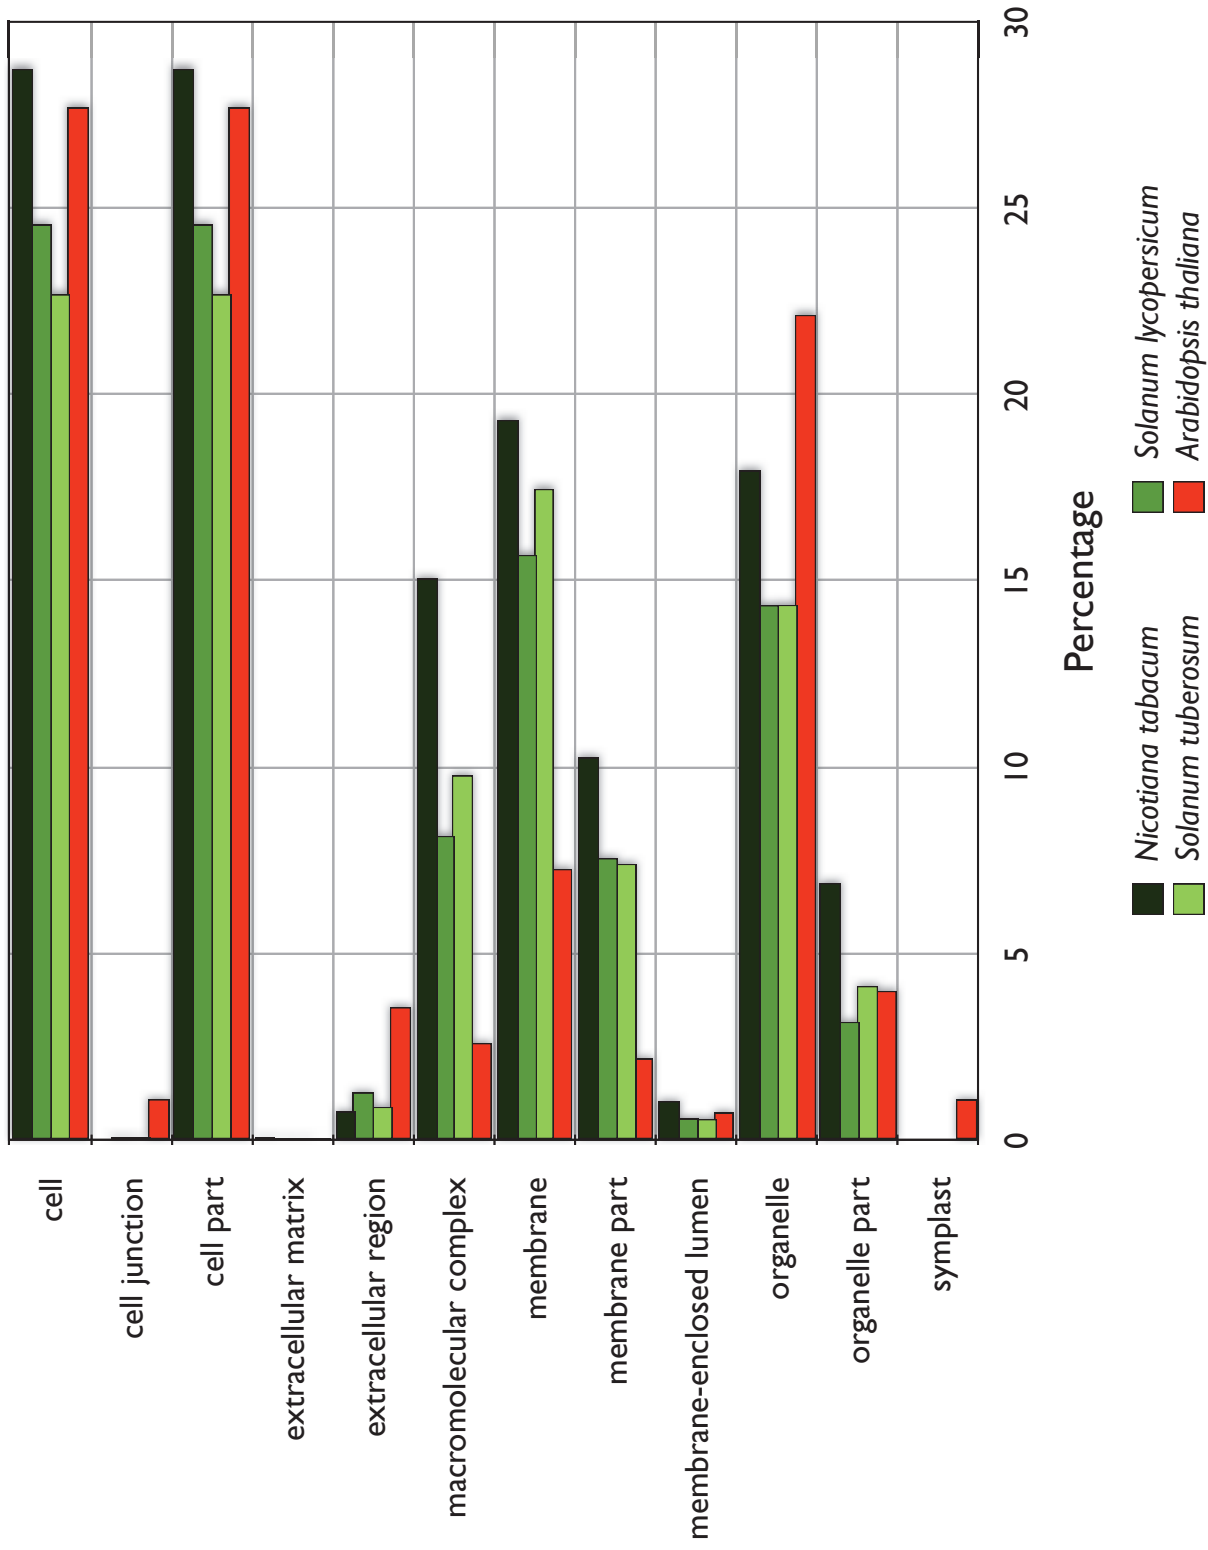

Gene Ontology Terms  
Cellular Component: level 2

*Nicotiana tabacum*

| GO Terms                | #    | %     |
|-------------------------|------|-------|
| cell                    | 5550 | 28.73 |
| cell junction           | 0    | 0     |
| cell part               | 5550 | 28.73 |
| extracellular matrix    | 9    | 0.05  |
| extracellular region    | 145  | 0.75  |
| macromolecular complex  | 2908 | 15.05 |
| membrane                | 3731 | 19.31 |
| membrane part           | 1981 | 10.25 |
| membrane-enclosed lumen | 199  | 1.03  |
| organelle               | 3468 | 17.95 |
| organelle part          | 1330 | 6.88  |

*Solanum lycopersicum*

| GO Terms                  | #    | %     |
|---------------------------|------|-------|
| cell                      | 3634 | 24.55 |
| cell junction             | 11   | 0.07  |
| cell part                 | 3634 | 24.55 |
| extracellular matrix      | 6    | 0.04  |
| extracellular region      | 186  | 1.26  |
| extracellular region part | 4    | 0.03  |
| macromolecular complex    | 1207 | 8.15  |
| membrane                  | 2323 | 15.69 |
| membrane part             | 1118 | 7.55  |
| membrane-enclosed lumen   | 83   | 0.56  |
| organelle                 | 2122 | 14.34 |
| organelle part            | 467  | 3.16  |
| virion                    | 3    | 0.02  |
| virion part               | 3    | 0.02  |

*Solanum tuberosum*

| GO Terms                | #    | %     |
|-------------------------|------|-------|
| cell                    | 2590 | 22.68 |
| cell junction           | 6    | 0.05  |
| cell part               | 2590 | 22.68 |
| extracellular matrix    | 5    | 0.04  |
| extracellular region    | 101  | 0.88  |
| macromolecular complex  | 1116 | 9.77  |
| membrane                | 1994 | 17.46 |
| membrane part           | 845  | 7.40  |
| membrane-enclosed lumen | 63   | 0.55  |
| organelle               | 1638 | 14.35 |
| organelle part          | 470  | 4.12  |

*Arabidopsis thaliana*

| GO Terms                  | #     | %     |
|---------------------------|-------|-------|
| cell                      | 21882 | 27.69 |
| cell junction             | 854   | 1.08  |
| cell part                 | 21882 | 27.69 |
| extracellular matrix      | 22    | 0.03  |
| extracellular region      | 2807  | 3.55  |
| extracellular region part | 23    | 0.03  |
| macromolecular complex    | 2044  | 2.59  |
| membrane                  | 5741  | 7.26  |
| membrane part             | 1714  | 2.17  |
| membrane-enclosed lumen   | 573   | 0.72  |
| organelle                 | 17491 | 22.13 |
| organelle part            | 3152  | 3.99  |
| symplast                  | 849   | 1.07  |

# Gene Ontology Terms

## Molecular Function: level 2

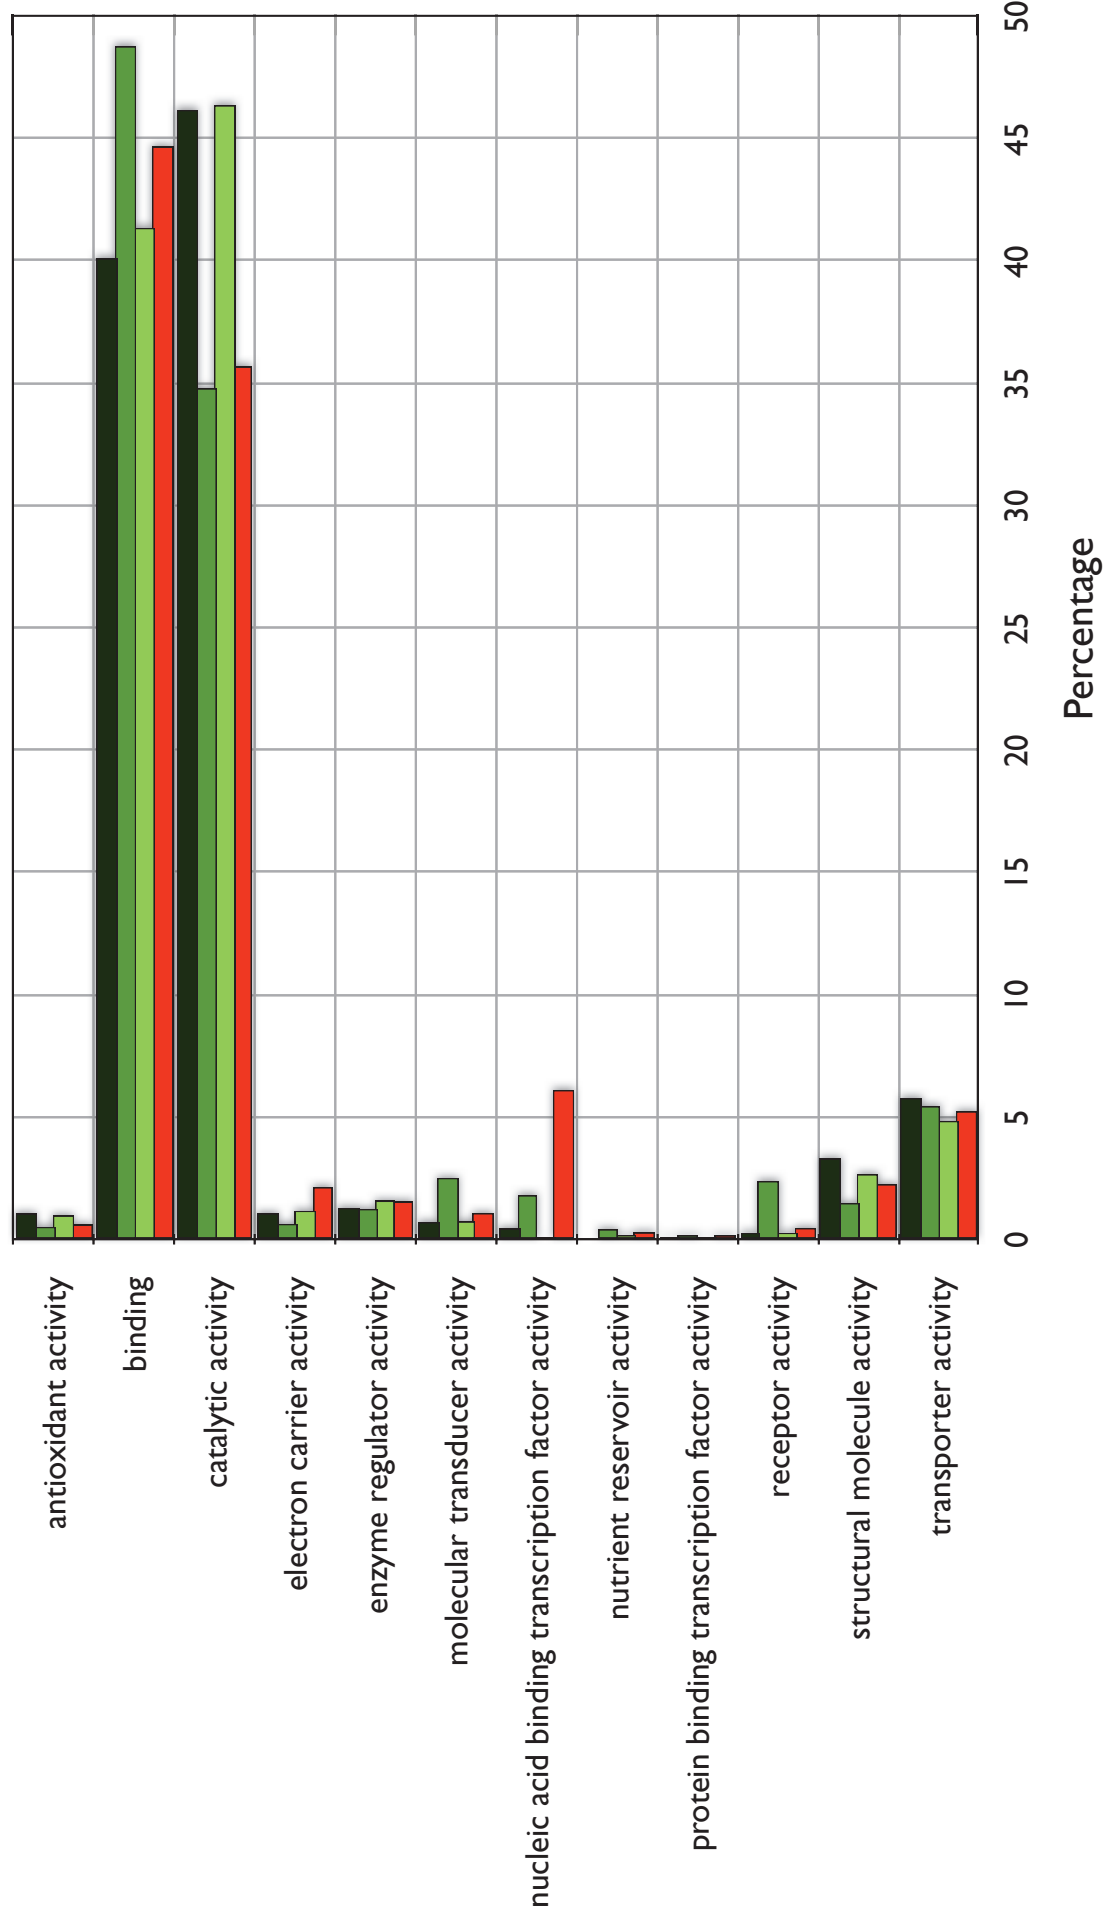

Gene Ontology Terms  
Molecular Function: level 2

*Nicotiana tabacum*

| GO Terms                                           | #     | %     |
|----------------------------------------------------|-------|-------|
| antioxidant activity                               | 330   | 1.03  |
| binding                                            | 12874 | 40.07 |
| catalytic activity                                 | 14826 | 46.14 |
| electron carrier activity                          | 335   | 1.04  |
| enzyme regulator activity                          | 404   | 1.26  |
| molecular transducer activity                      | 220   | 0.68  |
| nucleic acid binding transcription factor activity | 134   | 0.42  |
| protein binding transcription factor activity      | 24    | 0.07  |
| receptor activity                                  | 79    | 0.25  |
| structural molecule activity                       | 1055  | 3.28  |
| transporter activity                               | 1849  | 5.75  |

*Solanum lycopersicum*

| GO Terms                                           | #    | %     |
|----------------------------------------------------|------|-------|
| antioxidant activity                               | 87   | 0.49  |
| binding                                            | 8620 | 48.74 |
| catalytic activity                                 | 6148 | 34.76 |
| electron carrier activity                          | 108  | 0.61  |
| enzyme regulator activity                          | 215  | 1.22  |
| metallochaperone activity                          | 10   | 0.06  |
| molecular transducer activity                      | 440  | 2.49  |
| nucleic acid binding transcription factor activity | 315  | 1.78  |
| nutrient reservoir activity                        | 69   | 0.39  |
| protein binding transcription factor activity      | 24   | 0.14  |
| receptor activity                                  | 418  | 2.36  |
| structural molecule activity                       | 258  | 1.46  |
| transporter activity                               | 958  | 5.42  |

*Solanum tuberosum*

| GO Terms                                           | #    | %     |
|----------------------------------------------------|------|-------|
| antioxidant activity                               | 170  | 0.95  |
| binding                                            | 7362 | 41.32 |
| catalytic activity                                 | 8255 | 46.33 |
| electron carrier activity                          | 205  | 1.15  |
| enzyme regulator activity                          | 278  | 1.56  |
| molecular transducer activity                      | 126  | 0.71  |
| nucleic acid binding transcription factor activity | 9    | 0.05  |
| nutrient reservoir activity                        | 27   | 0.15  |
| protein binding transcription factor activity      | 11   | 0.06  |
| receptor activity                                  | 45   | 0.25  |
| structural molecule activity                       | 470  | 2.64  |
| transporter activity                               | 859  | 4.82  |

*Arabidopsis thaliana*

| GO Terms                                           | #     | %     |
|----------------------------------------------------|-------|-------|
| antioxidant activity                               | 143   | 0.58  |
| binding                                            | 10998 | 44.64 |
| catalytic activity                                 | 8783  | 35.65 |
| electron carrier activity                          | 519   | 2.11  |
| enzyme regulator activity                          | 375   | 1.52  |
| molecular transducer activity                      | 259   | 1.05  |
| nucleic acid binding transcription factor activity | 1497  | 6.08  |
| nutrient reservoir activity                        | 65    | 0.26  |
| protein binding transcription factor activity      | 35    | 0.14  |
| receptor activity                                  | 108   | 0.44  |
| structural molecule activity                       | 549   | 2.23  |
| transporter activity                               | 1283  | 5.21  |

# The 50 Most common InterPro Domains

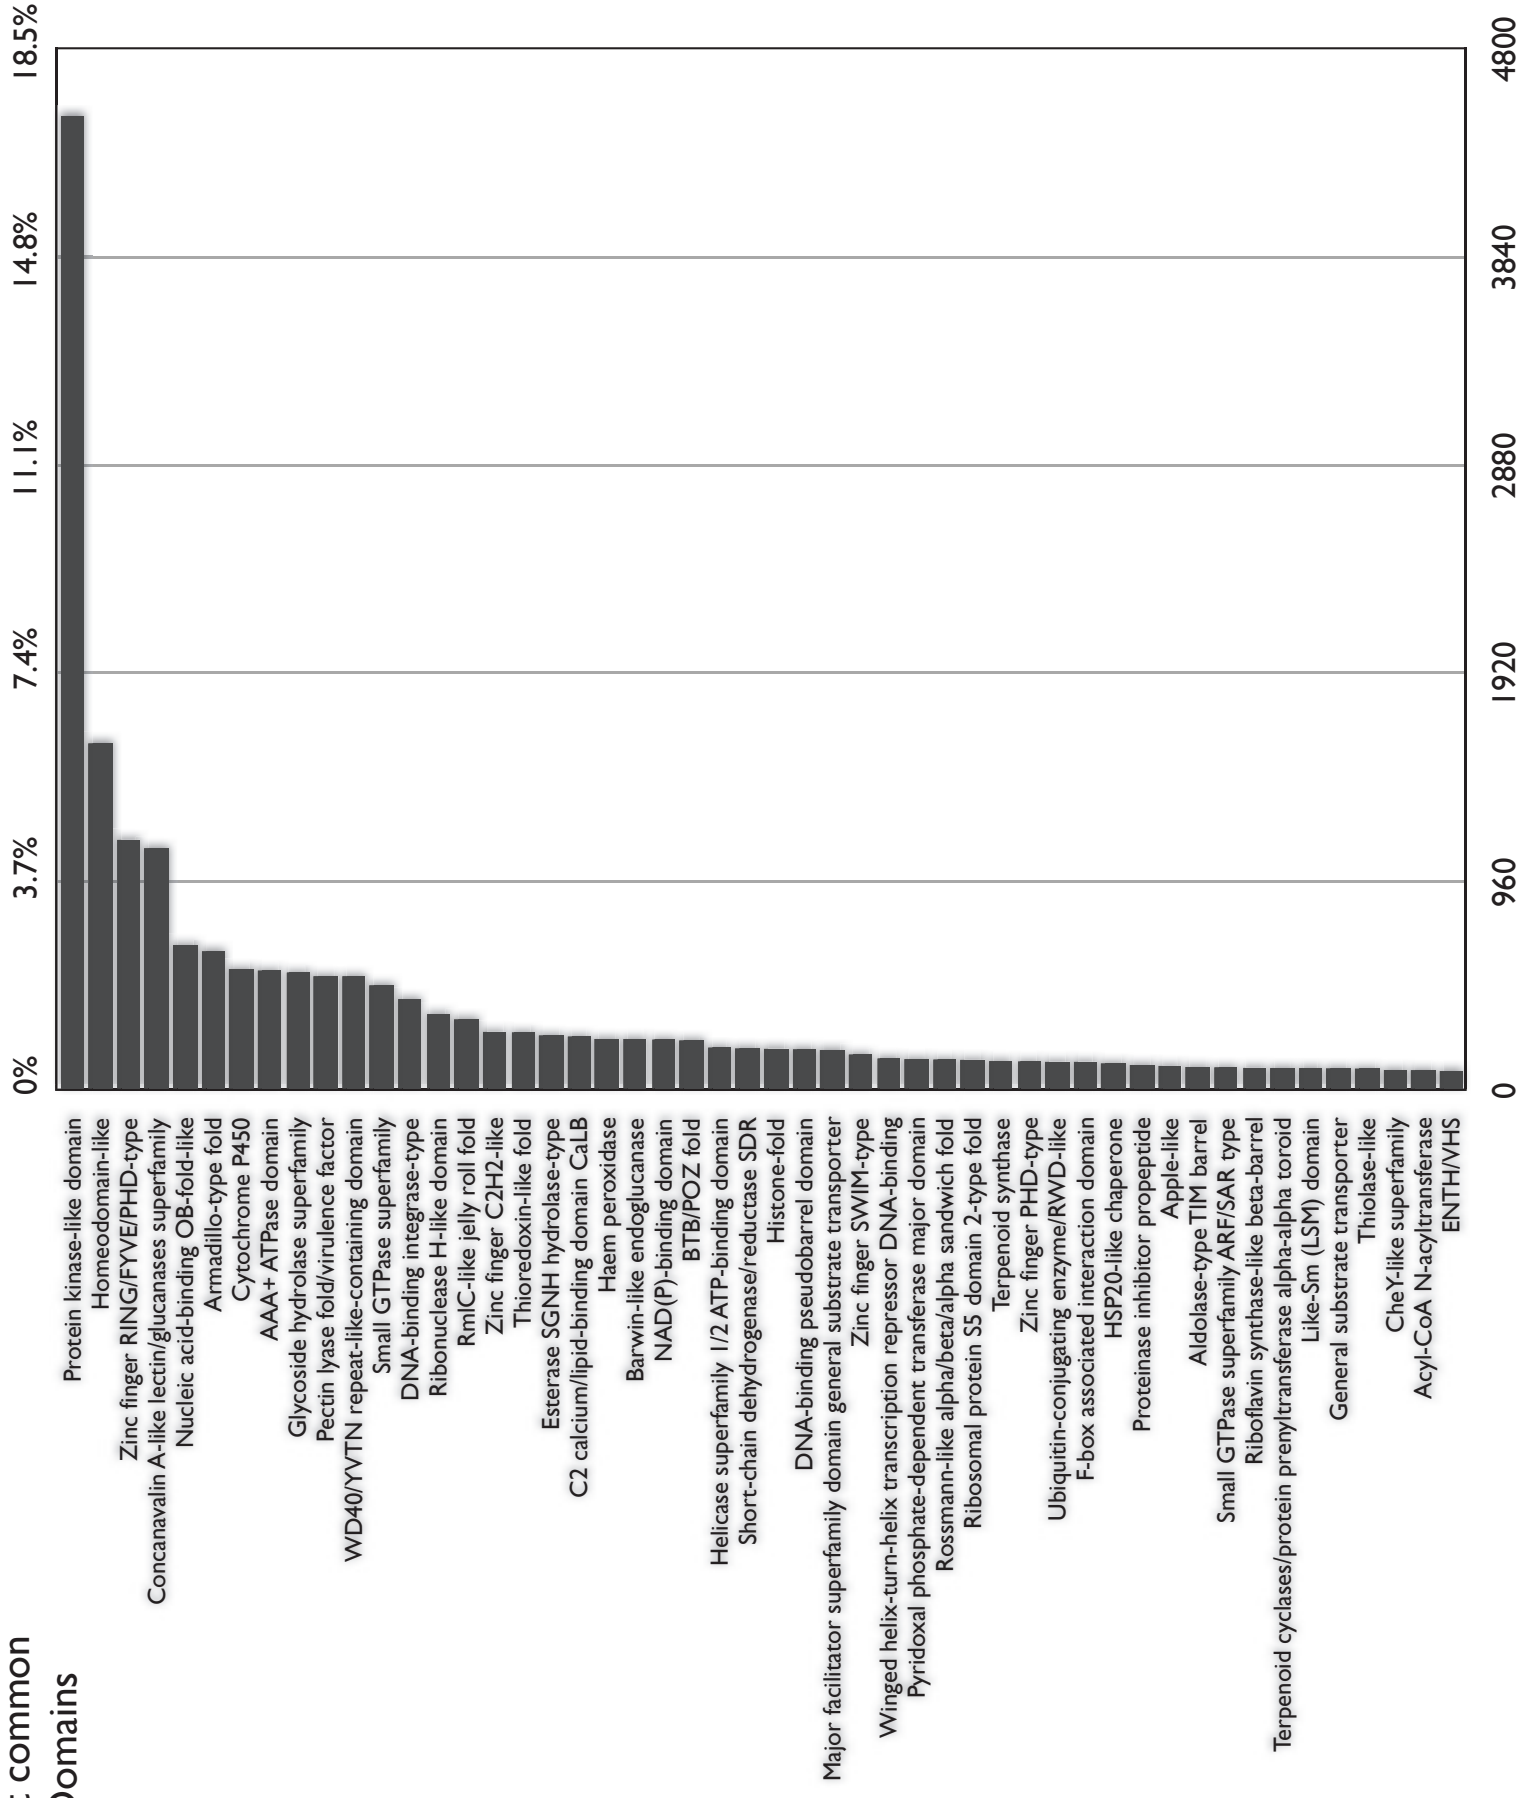

## The 50 Most common InterPro Domains

| InterPro_term | gene_num | Percentage | Description                                                         |
|---------------|----------|------------|---------------------------------------------------------------------|
| IPR011009     | 4489     | 17.325     | Protein kinase-like domain                                          |
| IPR009057     | 1596     | 6.160      | Homeodomain-like                                                    |
| IPR013083     | 1152     | 4.446      | Zinc finger, RING/FYVE/PHD-type                                     |
| IPR008985     | 1113     | 4.295      | Concanavalin A-like lectin/glucanases superfamily                   |
| IPR016027     | 667      | 2.574      | Nucleic acid-binding, OB-fold-like                                  |
| IPR016024     | 638      | 2.462      | Armadillo-type fold                                                 |
| IPR001128     | 556      | 2.146      | Cytochrome P450                                                     |
| IPR003593     | 549      | 2.119      | AAA+ ATPase domain                                                  |
| IPR017853     | 540      | 2.084      | Glycoside hydrolase, superfamily                                    |
| IPR011050     | 523      | 2.018      | Pectin lyase fold/virulence factor                                  |
| IPR015943     | 523      | 2.018      | WD40/YVTN repeat-like-containing domain                             |
| IPR001806     | 481      | 1.856      | Small GTPase superfamily                                            |
| IPR016177     | 418      | 1.613      | DNA-binding, integrase-type                                         |
| IPR012337     | 349      | 1.347      | Ribonuclease H-like domain                                          |
| IPR014710     | 324      | 1.250      | RimC-like jelly roll fold                                           |
| IPR015880     | 267      | 1.030      | Zinc finger, C2H2-like                                              |
| IPR012336     | 264      | 1.019      | Thioredoxin-like fold                                               |
| IPR013830     | 250      | 0.965      | Esterase, SGNH hydrolase-type                                       |
| IPR008973     | 245      | 0.946      | C2 calcium/lipid-binding domain, CaLB                               |
| IPR010255     | 234      | 0.903      | Haem peroxidase                                                     |
| IPR014733     | 234      | 0.903      | Barwin-like endoglucanase                                           |
| IPR016040     | 231      | 0.892      | NAD(P)-binding domain                                               |
| IPR011333     | 227      | 0.876      | BTB/POZ fold                                                        |
| IPR014001     | 194      | 0.749      | Helicase, superfamily 1/2, ATP-binding domain                       |
| IPR002198     | 190      | 0.733      | Short-chain dehydrogenase/reductase SDR                             |
| IPR009072     | 189      | 0.729      | Histone-fold                                                        |
| IPR015300     | 186      | 0.718      | DNA-binding pseudobarrel domain                                     |
| IPR016196     | 183      | 0.706      | Major facilitator superfamily domain, general substrate transporter |
| IPR007527     | 162      | 0.625      | Zinc finger, SWIM-type                                              |

| InterPro_term | gene_num | Percentage | Description                                                     |
|---------------|----------|------------|-----------------------------------------------------------------|
| IPR011991     | 144      | 0.556      | Winged helix-turn-helix transcription repressor DNA-binding     |
| IPR015424     | 141      | 0.544      | Pyridoxal phosphate-dependent transferase, major domain         |
| IPR014729     | 139      | 0.536      | Rossmann-like alpha/beta/alpha sandwich fold                    |
| IPR020568     | 138      | 0.533      | Ribosomal protein S5 domain 2-type fold                         |
| IPR008949     | 132      | 0.509      | Terpenoid synthase                                              |
| IPR001965     | 130      | 0.502      | Zinc finger, PHD-type                                           |
| IPR016135     | 129      | 0.498      | Ubiquitin-conjugating enzyme/RWD-like                           |
| IPR017451     | 129      | 0.498      | F-box associated interaction domain                             |
| IPR008978     | 121      | 0.467      | HSP20-like chaperone                                            |
| IPR009020     | 114      | 0.440      | Proteinase inhibitor, propeptide                                |
| IPR003609     | 110      | 0.425      | Apple-like                                                      |
| IPR013785     | 105      | 0.405      | Aldolase-type TIM barrel                                        |
| IPR006689     | 103      | 0.398      | Small GTPase superfamily, ARF/SAR type                          |
| IPR017938     | 101      | 0.390      | Riboflavin synthase-like beta-barrel                            |
| IPR008930     | 100      | 0.386      | Terpenoid cyclases/protein prenyltransferase alpha-alpha toroid |
| IPR010920     | 100      | 0.386      | Like-Sm (L-SM) domain                                           |
| IPR005828     | 98       | 0.378      | General substrate transporter                                   |
| IPR016039     | 97       | 0.374      | Thiolase-like                                                   |
| IPR011006     | 91       | 0.351      | CheY-like superfamily                                           |
| IPR016181     | 90       | 0.347      | Acyl-CoA N-acyltransferase                                      |
| IPR008942     | 86       | 0.332      | ENTH/VHS                                                        |



# 2169 Protein Kinases were found by HMM

## Class I - Transmembrane Receptor Kinase and Related non-Transmembrane Kinases

|                                                        |                                                                                           |     |
|--------------------------------------------------------|-------------------------------------------------------------------------------------------|-----|
| <b>Group 1.1</b>                                       |                                                                                           |     |
| PPC:1.1.1                                              | Leucine-rich transmembrane protein kinase/Strubbelig Receptor Family 1                    | 17  |
| PPC:1.1.2                                              | Putative protein kinase/Ser_thr kinase like protein/Putative receptor-like protein kinase | 4   |
| PPC:1.1.3                                              | Putative protein kinase/Putative receptor-like protein kinase                             | 20  |
| <b>Group 1.2 - Receptor Like Cytoplasmic Kinase</b>    |                                                                                           |     |
| PPC:1.2.1                                              | Receptor Like Cytoplasmic Kinase VIII                                                     | 22  |
| PPC:1.2.2                                              | Receptor Like Cytoplasmic Kinase VII                                                      | 114 |
| PPC:1.2.5                                              | ser_thr protein kinase like protein                                                       | 1   |
| <b>Group 1.3</b>                                       |                                                                                           |     |
| PPC:1.3.1                                              | Receptor-like protein kinase                                                              | 38  |
| PPC:1.3.2                                              | Leucine Rich Repeat Receptor VIII                                                         | 20  |
| PPC:1.3.3                                              | Leucine Rich Repeat Receptor Kinase I & Unknown Receptor Kinase I                         | 8   |
| PPC:1.3.7                                              | Receptor like protein kinase/Receptor lectin kinase like protein                          | 4   |
| <b>Group 1.4 - Crinkly 4_Like Kinase</b>               |                                                                                           |     |
| PPC:1.4.1                                              | Crinkly 4 Like Kinase                                                                     | 23  |
| PPC:1.4.2                                              | Tousled like kinase                                                                       | 1   |
| <b>Group 1.5</b>                                       |                                                                                           |     |
| PPC:1.5.1                                              | Wall Associated Kinase-like Kinase                                                        | 42  |
| PPC:1.5.2                                              | LRK10 Like Kinase (Type 1)                                                                | 17  |
| PPC:1.5.3                                              | Receptor Like Cytoplasmic Kinase IV                                                       | 4   |
| <b>Group 1.6</b>                                       |                                                                                           |     |
| PPC:1.6.1                                              | Leucine Rich Repeat Kinase IX                                                             | 22  |
| PPC:1.6.2                                              | Plant External Response Like Kinase                                                       | 45  |
| PPC:1.6.3                                              | Receptor Like Cytoplasmic Kinase V                                                        | 15  |
| PPC:1.6.4                                              | RKF3 Like Kinase                                                                          | 5   |
| <b>Group 1.7 - S-Domain and Duf26 Domain Kinase</b>    |                                                                                           |     |
| PPC:1.7.1                                              | S Domain Kinase (Type 1)                                                                  | 26  |
| PPC:1.7.2                                              | Domain of Unknown Function 26 (DUF26) Kinase                                              | 147 |
| <b>Group 1.8 - Leucine Rich Repeat Receptor Kinase</b> |                                                                                           |     |
| PPC:1.8.1                                              | Leucine Rich Repeat Kinase I                                                              | 12  |

|                                                         |                                                                                |     |
|---------------------------------------------------------|--------------------------------------------------------------------------------|-----|
| <b>Group 1.9</b>                                        |                                                                                |     |
| PPC:1.9.1                                               | CRPK1 Like Kinase (Types 1 and 2)                                              | 43  |
| PPC:1.9.2                                               | S Domain Kinase (Type 2)                                                       | 108 |
| PPC:1.9.3                                               | Putative receptor like protein kinase                                          | 8   |
| PPC:1.9.5                                               | Putative LRR receptor-like protein kinase/Receptor protein kinase like protein | 6   |
| <b>Group 1.10 - Receptor Like Cytoplasmic Kinase</b>    |                                                                                |     |
| PPC:1.10.1                                              | Receptor Like Cytoplasmic Kinase VI                                            | 37  |
| <b>Group 1.11 - Legume Lectin Domain Kinase</b>         |                                                                                |     |
| PPC:1.11.1                                              | Legume Lectin Domain Kinase                                                    | 49  |
| <b>Group 1.12 - Leucine Rich Repeat Receptor Kinase</b> |                                                                                |     |
| PPC:1.12.1                                              | Leucine Rich Repeat Kinase X                                                   | 12  |
| PPC:1.12.2                                              | Leucine Rich Repeat Kinase II & X                                              | 36  |
| PPC:1.12.3                                              | Leucine Rich Repeat Kinase VII                                                 | 18  |
| PPC:1.12.4                                              | Leucine Rich Repeat Kinase XI & XII                                            | 238 |
| PPC:1.12.5                                              | Leucine Rich Repeat Kinase X                                                   | 6   |
| <b>Group 1.13 - Leucine Rich Repeat Receptor Kinase</b> |                                                                                |     |
| PPC:1.13.1                                              | Leucine Rich Repeat Kinase VII                                                 | 2   |
| PPC:1.13.2                                              | Leucine Rich Repeat Kinase IV                                                  | 6   |
| PPC:1.13.3                                              | Leucine Rich Repeat Kinase III                                                 | 42  |
| PPC:1.13.4                                              | Leucine Rich Repeat Kinase III                                                 | 14  |
| PPC:1.13.5                                              | Leucine Rich Repeat Kinase III                                                 | 7   |
| <b>Group 1.14 -</b>                                     |                                                                                |     |
| PPC:1.14.1                                              | Crinkly 4 Like Kinase                                                          | 7   |
| PPC:1.14.2                                              | Receptor Like Cytoplasmic Kinase IX                                            | 28  |
| <b>Group 1.15 -</b>                                     |                                                                                |     |
| PPC:1.15.1                                              | Receptor Like Cytoplasmic Kinase I                                             | 9   |
| PPC:1.15.2                                              | Leucine Rich Repeat Kinase VI                                                  | 6   |
| PPC:1.15.3                                              | Leucine Rich Repeat Kinase IV                                                  | 4   |
| <b>Group 1.16 - Receptor Like Cytoplasmic Kinase</b>    |                                                                                |     |
| PPC:1.16.1                                              | Receptor Like Cytoplasmic Kinase II                                            | 18  |
| <b>Group 1.17 - Wall Associated Kinase</b>              |                                                                                |     |
| PPC:1.17.1                                              | Wall Associated Kinase                                                         | 1   |
| <b>Group 1.Other</b>                                    |                                                                                |     |
| PPC:1.Other                                             | Other Protein Kinase                                                           | 26  |

# 2169 Protein Kinases were found by HMM

## Class 2 - ATN1/CTR1/EDR1/GmPK6 like Kinase

| Group 2.1 - ATN1/CTR1/EDR1/GmPK6 like Kinase |                                         |    |
|----------------------------------------------|-----------------------------------------|----|
| PPC:2.1.1                                    | Light Sensor Kinase                     | 6  |
| PPC:2.1.2                                    | Ankyrin Repeat Domain Kinase            | 15 |
| PPC:2.1.3                                    | CTR1/EDR1 Kinase                        | 34 |
| PPC:2.1.4                                    | GmPK6/AMRK1 Family                      | 53 |
| PPC:2.1.5                                    | ATN1 Like Family                        | 9  |
| PPC:2.1.6                                    | Unknown Function Kinase                 | 3  |
| Group 2.2 - Unknown Function Protein Kinase  |                                         |    |
| PPC:2.2.1                                    | Unknown Function Kinase                 | 4  |
| PPC:2.2.2                                    | C-terminal Ankyrin Repeat Domain Kinase | 2  |

## Class 3 - Casein Kinase I

| Group 3.1 - Casein Kinase I |                        |    |
|-----------------------------|------------------------|----|
| PPC:3.1.1                   | Casein Kinase I Family | 38 |

## Class 5 - Other and Unclassified Protein Kinase

| Group 5.1 - Other Protein Kinase |              |   |
|----------------------------------|--------------|---|
| PPC:5.1.1                        | Other Kinase | 7 |
| PPC:5.1.2                        | Other Kinase | 4 |
| Group 5.2 - Other Protein Kinase |              |   |
| PPC:5.2.1                        | Other Kinase | 2 |

## Class 4 - Non-Transmembrane Protein Kinases

| Group 4.1 - Mitogen Activated Protein Kinase Kinase Kinase Kinase (MAP3K) |                                                     |     |
|---------------------------------------------------------------------------|-----------------------------------------------------|-----|
| PPC:4.1.1                                                                 | MAP3K                                               | 29  |
| PPC:4.1.2                                                                 | STE20-PAK Like Protein Kinase                       | 22  |
| PPC:4.1.3                                                                 | MAP2K                                               | 5   |
| PPC:4.1.4                                                                 | MAP2K                                               | 8   |
| PPC:4.1.5                                                                 | Possible MAP2K                                      | 3   |
| PPC:4.1.5.1                                                               | WNK like kinase - with no lysine kinase             | 26  |
| PPC:4.1.6                                                                 | Unknown Function Kinase                             | 15  |
| PPC:4.1.7                                                                 | APG1 Like Kinase                                    | 8   |
| Group 4.2 - Calcium Response Kinase                                       |                                                     |     |
| PPC:4.2.1                                                                 | Calcium Dependent Protein Kinase                    | 81  |
| PPC:4.2.2                                                                 | Phosphoenolpyruvate Carboxylase Kinase              | 9   |
| PPC:4.2.3                                                                 | Calcium/Calmodulin Dependent Protein Kinase (CCamK) | 2   |
| PPC:4.2.4                                                                 | SNF1 Related Protein Kinase (SnRK)                  | 111 |
| PPC:4.2.5                                                                 | Unknown Function Kinase                             | 12  |
| PPC:4.2.6                                                                 | IRE/NPH/PI dependent/S6 Kinase                      | 73  |
| PPC:4.2.7                                                                 | ELM1/PAK1/TOS3 Like Kinase                          | 4   |
| Group 4.3 - Unknown Function Protein Kinase                               |                                                     |     |
| PPC:4.3.1                                                                 | Unknown Function Kinase                             | 2   |
| PPC:4.3.2                                                                 | Unknown Function Kinase                             | 3   |
| Group 4.4 - Unknown Function Protein Kinase                               |                                                     |     |
| PPC:4.4.1                                                                 | Unknown Function Kinase                             | 69  |
| PPC:4.4.2                                                                 | Unknown Function Kinase                             | 2   |
| PPC:4.4.3                                                                 | Unknown Function Kinase                             | 3   |
| Group 4.5 - MAPK/GDC/CK2/GSK Kinases                                      |                                                     |     |
| PPC:4.5.1                                                                 | MAPK Family                                         | 42  |
| PPC:4.5.1.1                                                               | Male grem cell-associated kinase (mak)              | 9   |
| PPC:4.5.2                                                                 | CDC2 Like Kinase Family                             | 60  |
| PPC:4.5.3                                                                 | Casein Kinase II Family                             | 6   |
| PPC:4.5.4                                                                 | GSK3/Shaggy Like Protein Kinase Family              | 23  |
| PPC:4.5.5                                                                 | Unknown Function Kinase                             | 2   |
| PPC:4.5.6                                                                 | LAMMER Kinase Family                                | 8   |
| PPC:4.5.7                                                                 | Unknown Function Kinase                             | 9   |
| PPC:4.5.8                                                                 | Unknown Function Kinase                             | 8   |

## 2169 Protein Kinases were found by HMM (sorted by occurrence)

| PK                                                            | #   |
|---------------------------------------------------------------|-----|
| Leucine Rich Repeat Kinase XI & XII                           | 238 |
| Domain of Unknown Function 26 (DUF26) Kinase                  | 147 |
| Unknown Function Kinase                                       | 132 |
| Receptor Like Cytoplasmic Kinase VII                          | 114 |
| SNF1 Related Protein Kinase (SnRK)                            | 111 |
| S Domain Kinase (Type 2)                                      | 108 |
| Calcium Dependent Protein Kinase                              | 81  |
| IRE/NPH/PI dependent/S6 Kinase                                | 73  |
| Leucine Rich Repeat Kinase III                                | 63  |
| CDC2 Like Kinase Family                                       | 60  |
| GmpK6/AtMPK1 Family                                           | 53  |
| Legume Lectin Domain Kinase                                   | 49  |
| Plant External Response Like Kinase                           | 45  |
| CRPK1 Like Kinase (Types 1 and 2)                             | 43  |
| MAPK Family                                                   | 42  |
| Wall Associated Kinase-like Kinase                            | 42  |
| Casein Kinase I Family                                        | 38  |
| Receptor-like protein kinase                                  | 38  |
| Receptor Like Cytoplasmic Kinase VI                           | 37  |
| Leucine Rich Repeat Kinase II & X                             | 36  |
| CTR1/EDR1 Kinase                                              | 34  |
| Crinkly 4 Like Kinase                                         | 30  |
| MAP3K                                                         | 29  |
| Receptor Like Cytoplasmic Kinase IX                           | 28  |
| S Domain Kinase (Type 1)                                      | 26  |
| WNK like kinase - with no lysine kinase                       | 26  |
| Other Protein Kinase                                          | 25  |
| GSK3/Shaggy Like Protein Kinase Family                        | 23  |
| Leucine Rich Repeat Kinase IX                                 | 22  |
| Receptor Like Cytoplasmic Kinase VIII                         | 22  |
| STE20-PAK Like Protein Kinase                                 | 22  |
| Leucine Rich Repeat Kinase VII                                | 20  |
| Leucine Rich Repeat Receptor VIII                             | 20  |
| Putative protein kinase/Putative receptor-like protein kinase | 20  |

| PK                                                                                        | #  |
|-------------------------------------------------------------------------------------------|----|
| Leucine Rich Repeat Kinase X                                                              | 18 |
| Receptor Like Cytoplasmic Kinase II                                                       | 18 |
| LRK10 Like Kinase (Type 1)                                                                | 17 |
| Leucine-rich transmembrane protein kinase/Strubbelig Receptor Family 1                    | 17 |
| Ankyrin Repeat Domain Kinase                                                              | 15 |
| Receptor Like Cytoplasmic Kinase V                                                        | 15 |
| MAP2K                                                                                     | 13 |
| Other Kinase                                                                              | 13 |
| Leucine Rich Repeat Kinase I                                                              | 12 |
| Leucine Rich Repeat Kinase IV                                                             | 10 |
| ATN1 Like Family                                                                          | 9  |
| Male grem cell-associated kinase (mak)                                                    | 9  |
| Phosphoenolpyruvate Carboxylase Kinase                                                    | 9  |
| Receptor Like Cytoplasmic Kinase I                                                        | 9  |
| APG1 Like Kinase                                                                          | 8  |
| LAMMER Kinase Family                                                                      | 8  |
| Leucine Rich Repeat Receptor Kinase I & Unknown Receptor Kinase I                         | 8  |
| Putative receptor like protein kinase                                                     | 8  |
| Casein Kinase II Family                                                                   | 6  |
| Leucine Rich Repeat Kinase VI                                                             | 6  |
| Light Sensor Kinase                                                                       | 6  |
| Putative LRR receptor-like protein kinase/Receptor protein kinase like protein            | 6  |
| RKF3 Like Kinase                                                                          | 5  |
| ELM1/PAK1/TOS3 Like Kinase                                                                | 4  |
| Putative protein kinase/Ser_thr kinase like protein/Putative receptor-like protein kinase | 4  |
| Receptor Like Cytoplasmic Kinase IV                                                       | 4  |
| Receptor like protein kinase/Receptor lectin kinase like protein                          | 4  |
| Possible MAP2K                                                                            | 3  |
| C-terminal Ankyrin Repeat Domain Kinase                                                   | 2  |
| Calcium/Calmodulin Dependent Protein Kinase (CCamK)                                       | 2  |
| Tousled like kinase                                                                       | 1  |
| Wall Associated Kinase                                                                    | 1  |
| ser_thr protein kinase like protein                                                       | 1  |

# 4713 Transcription factor were found by HMM (sorted by occurrence)

| TF        | #   |
|-----------|-----|
| MYB       | 406 |
| AP2-EREBP | 374 |
| NAC       | 263 |
| bHLH      | 247 |
| MADS      | 219 |
| C2H2      | 215 |
| HB        | 185 |
| WRKY      | 151 |
| C3H       | 141 |
| bZIP      | 136 |
| Orphans   | 133 |
| ABI3VP1   | 132 |
| FAR1      | 117 |
| LOB       | 106 |
| GRAS      | 102 |
| CCAAT     | 92  |
| PHD       | 81  |
| G2-like   | 80  |
| mTERF     | 80  |
| GNAT      | 79  |

| TF             | #  |
|----------------|----|
| SET            | 77 |
| SNF2           | 74 |
| C2C2-Dof       | 72 |
| TCP            | 62 |
| AUX/IAA        | 57 |
| C2C2-GATA      | 57 |
| Trihelix       | 56 |
| HSF            | 53 |
| SBP            | 51 |
| ARF            | 45 |
| SWI/SNF-BAF60b | 42 |
| OFP            | 40 |
| Jumonji        | 36 |
| TRAF           | 34 |
| zf-HD          | 33 |
| RWP-RK         | 31 |
| FHA            | 29 |
| TUB            | 26 |
| Tify           | 26 |
| GRF            | 24 |

| TF           | #  |
|--------------|----|
| HMG          | 23 |
| BES1         | 22 |
| PLATZ        | 22 |
| ARR-B        | 20 |
| Alfin-like   | 20 |
| GeBP         | 20 |
| C2C2-CO-like | 19 |
| ARID         | 18 |
| SRS          | 18 |
| C2C2-YABBY   | 17 |
| IWS1         | 17 |
| LIM          | 17 |
| BSD          | 16 |
| EIL          | 16 |
| DDT          | 14 |
| Sigma70-like | 14 |
| TAZ          | 14 |
| E2F-DP       | 13 |
| BBR/BPC      | 12 |
| CAMTA        | 11 |

| TF              | #  |
|-----------------|----|
| SWI/SNF-SWI3    | 10 |
| LUG             | 9  |
| Rcd1-like       | 9  |
| CPP             | 8  |
| Pseudo ARR-B    | 8  |
| Coactivator p15 | 7  |
| DBP             | 7  |
| MBF1            | 7  |
| CSD             | 6  |
| S1Fa-like       | 6  |
| PBF-2-like      | 5  |
| ULT             | 5  |
| VOZ             | 4  |
| HRT             | 3  |
| SAP             | 3  |
| LFY             | 2  |
| MED6            | 2  |
| MED7            | 2  |
| SOH1            | 2  |
| NOZZLE          | 1  |

4713 Transcription factor were found by HMM (alphabetically sorted)

## 3972 Transcription factors

| TF           | #   |
|--------------|-----|
| ABI3VP1      | 132 |
| Alfin-like   | 20  |
| AP2-EREBP    | 374 |
| ARF          | 45  |
| ARR-B        | 20  |
| BBR/BPC      | 12  |
| BES1         | 22  |
| bHLH         | 247 |
| BSD          | 16  |
| bZIP         | 136 |
| C2C2-CO-like | 19  |
| C2C2-Dof     | 72  |
| C2C2-GATA    | 57  |
| C2C2-YABBY   | 17  |
| C2H2         | 215 |

| TF      | #   |
|---------|-----|
| C3H     | 141 |
| CAMTA   | 11  |
| CCAAT   | 92  |
| CPP     | 8   |
| CSD     | 6   |
| DBP     | 7   |
| E2F-DP  | 13  |
| EIL     | 16  |
| FAR1    | 117 |
| FHA     | 29  |
| G2-like | 80  |
| GeBP    | 20  |
| GRAS    | 102 |
| GRF     | 24  |
| HB      | 185 |

| TF         | #   |
|------------|-----|
| HRT        | 3   |
| HSF        | 53  |
| LFY        | 2   |
| LIM        | 17  |
| LOB        | 106 |
| MADS       | 219 |
| mTERF      | 80  |
| MYB        | 406 |
| NAC        | 263 |
| NOZZLE     | 1   |
| OFF        | 40  |
| PBF-2-like | 5   |
| PLATZ      | 22  |
| RWP-RK     | 31  |
| S1Fa-like  | 6   |

| TF           | #   |
|--------------|-----|
| SAP          | 3   |
| SBP          | 51  |
| Sigma70-like | 14  |
| SRS          | 18  |
| TAZ          | 14  |
| TCP          | 62  |
| Tify         | 26  |
| Trihelix     | 56  |
| TUB          | 26  |
| ULT          | 5   |
| VOZ          | 4   |
| WRKY         | 151 |
| zf-HD        | 33  |

4713 Transcription factor were found by HMM (alphabetically sorted)

## 741 Transcriptional regulators

|                 |     |
|-----------------|-----|
| ARID            | 18  |
| AUX/IAA         | 57  |
| Coactivator p15 | 7   |
| DDT             | 14  |
| GNAT            | 79  |
| HMG             | 23  |
| IWS1            | 17  |
| Jumonji         | 36  |
| LUG             | 9   |
| MED6            | 2   |
| MED7            | 2   |
| MBF1            | 7   |
| Orphans         | 133 |
| PHD             | 81  |
| Pseudo ARR-B    | 8   |
| Rcd1-like       | 9   |
| SET             | 77  |
| SNF2            | 74  |
| SOH1            | 2   |
| SWI/SNF-BAF60b  | 42  |
| SWI/SNF-SWI3    | 10  |
| TRAF            | 34  |
