# Supplementary material for: A reference genome for Nicotiana tabacum enables map-based cloning of homeologous loci implicated in nitrogen utilization efficiency
Source: PubMed Central journal article supplement (PMC5474855; doi:10.1186/s12864-017-3791-6), 2017-06-19
Supplement: 12864_2017_3791_MOESM5_ESM.pdf [file 12864_2017_3791_MOESM5_ESM.pdf]

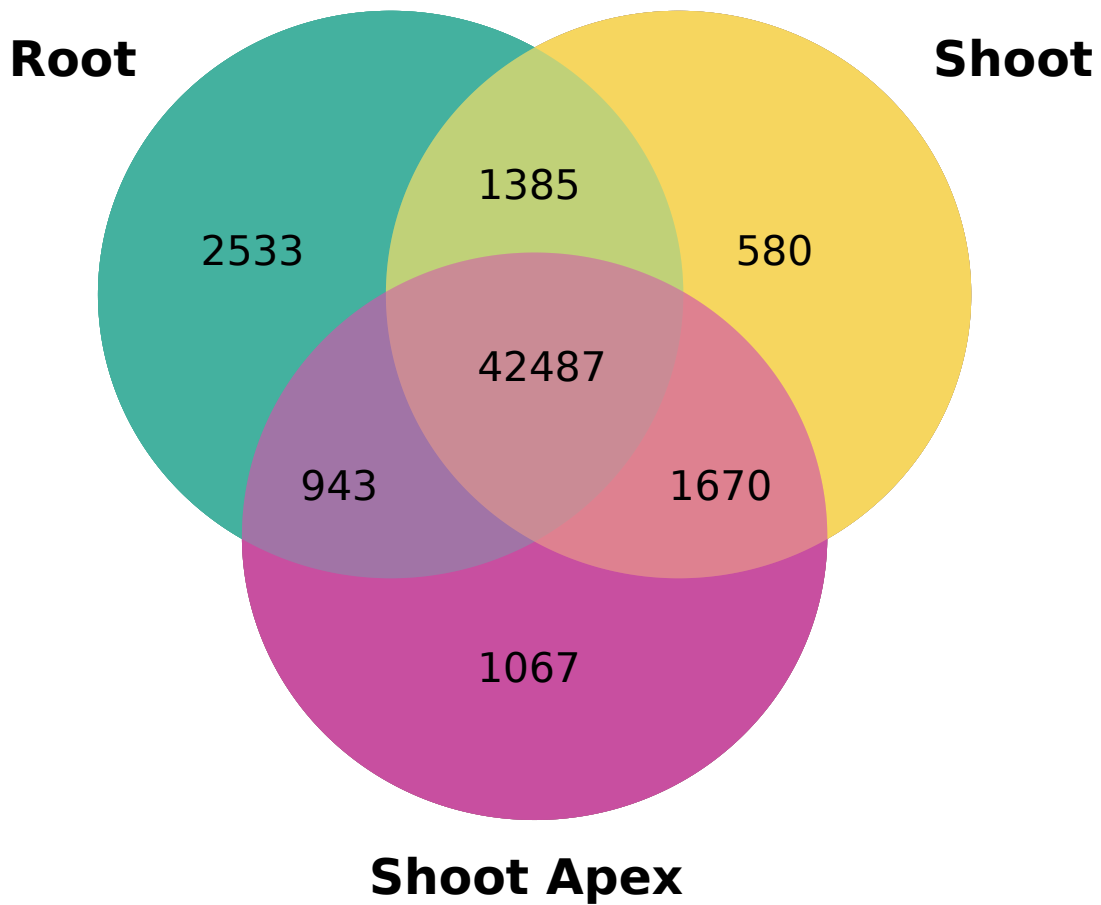

| Sample Name | Tissue    | Time Point | Replicate | Raw Reads | Filtered Reads | % Filtered | Reads Mapped | % Mapped | % Duplication |
|-------------|-----------|------------|-----------|-----------|----------------|------------|--------------|----------|---------------|
| A6140       | Root      | ZT0        | R1        | 43870402  | 43273979       | 98.64      | 17070456     | 39.45    | 41.8          |
| A6141       | Root      | ZT0        | R2        | 32377489  | 31991359       | 98.81      | 11904484     | 37.21    | 45.44         |
| A6142       | Root      | ZT0        | R3        | 40835020  | 40437551       | 99.03      | 15328554     | 37.91    | 44.37         |
| A6149       | Shoot     | ZT0        | R1        | 32327637  | 32093901       | 99.28      | 12418252     | 38.69    | 38.65         |
| A6150       | Shoot     | ZT0        | R2        | 40623084  | 39815155       | 98.01      | 15699541     | 39.43    | 39.82         |
| A6151       | Shoot     | ZT0        | R3        | 35337160  | 34999827       | 99.05      | 12759085     | 36.45    | 42.64         |
| A6158       | ShootApex | ZT0        | R1        | 28165222  | 28018049       | 99.48      | 11384982     | 40.63    | 38.72         |
| A6159       | ShootApex | ZT0        | R2        | 37969866  | 37062211       | 97.61      | 13673051     | 36.89    | 48.05         |
| A6160       | ShootApex | ZT0        | R3        | 33266812  | 33009200       | 99.23      | 13606778     | 41.22    | 44.65         |
| A6167       | Root      | ZT6        | R1        | 39635426  | 38805901       | 97.91      | 5273883      | 13.59    | 74.64         |
| A6168       | Root      | ZT6        | R2        | 34278254  | 33776361       | 98.54      | 8036587      | 23.79    | 59.75         |
| A6169       | Root      | ZT6        | R3        | 33479877  | 33227956       | 99.25      | 13146825     | 39.57    | 42.04         |
| A6176       | Shoot     | ZT6        | R1        | 50166956  | 48156700       | 95.99      | 5458175      | 11.33    | 89.96         |
| A6177       | Shoot     | ZT6        | R2        | 53042894  | 52672970       | 99.30      | 21311841     | 40.46    | 42.23         |
| A6178       | Shoot     | ZT6        | R3        | 30430562  | 30230218       | 99.34      | 12031531     | 39.80    | 41.83         |
| A6185       | ShootApex | ZT6        | R1        | 54461029  | 53989810       | 99.13      | 21537148     | 39.89    | 48.1          |
| A6186       | ShootApex | ZT6        | R2        | 41107412  | 40852094       | 99.38      | 17525739     | 42.90    | 43.33         |
| A6187       | ShootApex | ZT6        | R3        | 36453862  | 36219573       | 99.36      | 14675978     | 40.52    | 43.73         |
| A6194       | Root      | ZT12       | R1        | 54140362  | 53760731       | 99.30      | 21360630     | 39.73    | 41.69         |
| A6195       | Root      | ZT12       | R2        | 40354648  | 39967798       | 99.04      | 15612819     | 39.06    | 36.1          |
| A6196       | Root      | ZT12       | R3        | 30431742  | 30215084       | 99.29      | 12054581     | 39.90    | 41.67         |
| A6203       | Shoot     | ZT12       | R1        | 36055980  | 35790086       | 99.26      | 13673743     | 38.21    | 41.29         |
| A6204       | Shoot     | ZT12       | R2        | 38943340  | 38582281       | 99.07      | 14485476     | 37.54    | 36.57         |
| A6205       | Shoot     | ZT12       | R3        | 32873932  | 32642330       | 99.30      | 13036886     | 39.94    | 34.31         |
| A6212       | ShootApex | ZT12       | R1        | 56610222  | 55350519       | 97.77      | 21162372     | 38.23    | 27.45         |
| A6213       | ShootApex | ZT12       | R2        | 39566661  | 39273575       | 99.26      | 15837289     | 40.33    | 42.8          |
| A6214       | ShootApex | ZT12       | R3        | 57139987  | 56753817       | 99.32      | 22763443     | 40.11    | 47.35         |
| A6221       | Root      | ZT18       | R1        | 34302320  | 33880198       | 98.77      | 12024593     | 35.49    | 41.25         |
| A6222       | Root      | ZT18       | R2        | 38093675  | 24268245       | 63.71      | 855912       | 3.53     | 39.77         |
| A6223       | Root      | ZT18       | R3        | 40797351  | 40494453       | 99.26      | 16284365     | 40.21    | 40.21         |
| A6230       | Shoot     | ZT18       | R1        | 31954364  | 31593165       | 98.87      | 12535413     | 39.68    | 34.9          |
| A6231       | Shoot     | ZT18       | R2        | 43330745  | 41524157       | 95.83      | 4835524      | 11.65    | 80.88         |
| A6232       | Shoot     | ZT18       | R3        | 32557546  | 32261239       | 99.09      | 12686586     | 39.32    | 37.41         |
| A6239       | ShootApex | ZT18       | R1        | 31713996  | 31574094       | 99.56      | 12946068     | 41.00    | 36.55         |
| A6240       | ShootApex | ZT18       | R2        | 29910041  | 29763220       | 99.51      | 12052232     | 40.49    | 39.42         |
| A6241       | ShootApex | ZT18       | R3        | 41946226  | 41534139       | 99.02      | 16046566     | 38.63    | 40.01         |
