# Supplementary material for: A reference genome for Nicotiana tabacum enables map-based cloning of homeologous loci implicated in nitrogen utilization efficiency
Source: PubMed Central journal article supplement (PMC5474855; doi:10.1186/s12864-017-3791-6), 2017-06-19
Supplement: 12864_2017_3791_MOESM6_ESM.pdf [file 12864_2017_3791_MOESM6_ESM.pdf]

Yb1\_cDNA\_K326 1 ATGGGAACGCTAACGAGCTGCAGTTTCAGCTCAATGAATATAAGGTTCCGTTTGAATCCTCCAGTTAATACACTTTCAG  
Yb1\_cDNA\_TN90 1 ATGGGAACGCTAACGAGCTGCAGTTTCAGCACAATGAATATAAGGTTCCGTTTGAATCCTCCAGTTAATACACTTTCAG  
Yb2\_cDNA\_K326 1 ATGGGAACGCTAACGAGCTGCAGTTTCAGCACAATGAATATAAGGTTCCGTTTGAATCCTCCAGTTAATACAGTTCAG  
Yb2\_cDNA\_TN90 1 ATGGGAACGCTAACGAGCTGCAGTTTCAGCACAATGAATATAAGGTTCCGTTTGAATCCTCCAGTTAATACAGTTCAG

Yb1\_cDNA\_K326 81 TCGAAGAATCCAATTGAAGAGAATGTCCAAACGGAATTCGGTTCGATTGATTATTAGGTGTAGTAGCGGTAGTAGTGGCA  
Yb1\_cDNA\_TN90 81 TCGAAGAATCCAATTGAAGAGAATGTCCAAACGGAATTCGGTTCGATTGATTATTAGGTGTAGTAGCGGTAGTAGTGGCA  
Yb2\_cDNA\_K326 81 TCGAAGAATCCAATTGAAGAGAATGTCCAAACGGAATTCGGTTCGATTGATTATTAGGTGTAGT-----AGTGGAA  
Yb2\_cDNA\_TN90 81 TCGAAGAATCCAATTGAAGAGAATGTCCAAACGGAATTCGGTTCGATTGATTATTAGGTGTAGT-----AGTGGAA

Yb1\_cDNA\_K326 161 ATGGCAGTAGCAATACAGTGGTAGCAGTAGCGATGGGAAATTGGAAAAGGATTCTTCAAATTTGCTACAGTTACTGAA  
Yb1\_cDNA\_TN90 161 ATGGCAGTAGCAATACAGTGGTAGCAGTAGCGATGGGAAATTGGAAAAGGATTCTTCAAATTTGCTACAGTTACTGAA  
Yb2\_cDNA\_K326 152 ATGGCAGTAGCAATACAGTGGTAGCAGTAGCGATGGGAAATTGGAAAAGGATTCTTCAAATTTGCTACAGTTACTGAA  
Yb2\_cDNA\_TN90 152 ATGGCAGTAGCAATACAGTGGTAGCAGTAGCGATGGGAAATTGGAAAAGGATTCTTCAAATTTGCTACAGTTACTGAA

Yb1\_cDNA\_K326 241 GAAACCACTGAAGAAAGGAACGGCGGGCGGTGGCCAGCGGTGTGGAAAATGATTCGGATGATTCTCCGGTGTCAATTTCT  
Yb1\_cDNA\_TN90 241 GAAACCACTGAAGAAAGGAACGGCGGGCGGTGGCCAGCGGTGTGGAAAATGATTCGGATGATTCTCCGGTGTCAATTTCT  
Yb2\_cDNA\_K326 232 GAAACCACTGAAGAAAGGAACGGCGGGCGGTGGCCAGCGGTGTGGAAAATGATTCGGATGATTCTCCGGTGTCAATTTCT  
Yb2\_cDNA\_TN90 232 GAAACCACTGAAGAAAGGAACGGCGGGCGGTGGCCAGCGGTGTGGAAAATGATTCGGATGATTCTCCGGTGTCAATTTCT

Yb1\_cDNA\_K326 321 TTCCAGACCAACAATATCCACTGTTGGATCAACTATAATAATTTCCAAGTAGATTCTTTTAAGTTGATGGAACCTCTTG  
Yb1\_cDNA\_TN90 321 TTCCAGACCAACAATATCCACTGTTGGATCAACTATAATAATTTCCAAGTAGATTCTTTTAAGTTGATGGAACCTCTTG  
Yb2\_cDNA\_K326 312 TTCCAGACCAACAATATCCACTGTTGGATCAACTATAATAATTTCCAAGTAGATTCTTTTAAGTTGATGGAACCTCTTG  
Yb2\_cDNA\_TN90 312 TTCCAGACCAACAATATCCACTGTTGGATCAACTATAATAATTTCCAAGTAGATTCTTTTAAGTTGATGGAACCTCTTG

Yb1\_cDNA\_K326 401 GACCAGAAAAGGTTGATCCCAGTGTGTAAGTTCAATTAAGGAAAAGTTATTTGGCTACTCTACTTTTTGGGTGACTAAA  
Yb1\_cDNA\_TN90 401 GACCAGAAAAGGTTGATCCCAGTGTGTAAGTTCAATTAAGGAAAAGTTATTTGGCTACTCTACTTTTTGGGTGACTAAA  
Yb2\_cDNA\_K326 392 GACCAGAAAAGGTTGATCCCAGTGTGTAAGTTCAATTAAGGAAAAGTTATTTGGCTACTCTACTTTTTGGGTGACTAAA  
Yb2\_cDNA\_TN90 392 GACCAGAAAAGGTTGATCCCAGTGTGTAAGTTCAATTAAGGAAAAGTTATTTGGCTACTCTACTTTTTGGGTGACTAAA

Yb1\_cDNA\_K326 481 GAAGAACCATTTGGAGATCTTGGAGAGGGCATTCTTTTCTTGGGAATCTTAGAGGAAAGAGGGAGGATGTTTTGCCAA  
Yb1\_cDNA\_TN90 481 GAAGAACCATTTGGAGATCTTGGAGAGGGCATTCTTTTCTTGGGAATCTTAGAGGAAAGAGGGAGGATGTTTTGCCAA  
Yb2\_cDNA\_K326 472 GAAGAACCATTTGGAGATCTTGGAGAGGGCATTCTTTTCTTGGGAATCTTAGAGGAAAGAGGGAGGATGTTTTGCCAA  
Yb2\_cDNA\_TN90 472 GAAGAACCATTTGGAGATCTTGGAGAGGGCATTCTTTTCTTGGGAATCTTAGAGGAAAGAGGGAGGATGTTTTGCCAA

Yb1\_cDNA\_K326 561 ACTTCAGAGTCAGTTATCAGAAATTATGGGTGATAAGTACAACCTGTTTCATGGTGGAGGAACTAATTCAGAGGGCCAG  
Yb1\_cDNA\_TN90 561 ACTTCAGAGTCAGTTATCAGAAATTATGGGTGATAAGTACAACCTGTTTCATGGTGGAGGAACTAATTCAGAGGGCCAG  
Yb2\_cDNA\_K326 552 ACTTCAGAGTCAGTTATCAGAAATTATGGGTGATAAGTACAACCTGTTTCATGGTGGAGGAACTAATTCAGAGGGCCAG  
Yb2\_cDNA\_TN90 552 ACTTCAGAGTCAGTTATCAGAAATTATGGGTGATAAGTACAACCTGTTTCATGGTGGAGGAACTAATTCAGAGGGCCAG

Yb1\_cDNA\_K326 641 ACCCCGTTGGTGGGCCAGAGTTAGCTTTGGTATGCTGCGGAAAGAAGTTTCTGAACCAGGTCCAACAACCTCTCTGGCAA  
Yb1\_cDNA\_TN90 641 ACCCCGTTGGTGGGCCAGAGTTAGCTTTGGTATGCTGCGGAAAGAAGTTTCTGAACCAGGTCCAACAACCTCTCTGGCAA  
Yb2\_cDNA\_K326 632 ACCCCGTTGGTGGGCCAGAGTTAGCTTTGGTATGCTGCGGAAAGAAGTTTCTGAACCAGGTCCAACAACCTCTCTGGCAA  
Yb2\_cDNA\_TN90 624 ACCCCGTTGGTGGGCCAGAGTTAGCTTTGGTATGCTGCGGAAAGAAGTTTCTGAACCAGGTCCAACAACCTCTCTGGCAA

Yb1\_cDNA\_K326 721 TATGTAATTGCTTTTCTGTTGTTCCTTCTCACATTTGGTTCCTCTGTGGAGCTAGGAATTGCATCTCAGATAACTCGCCT  
Yb1\_cDNA\_TN90 721 TATGTAATTGCTTTTCTGTTGTTCCTTCTCACATTTGGTTCCTCTGTGGAGCTAGGAATTGCATCTCAGATAACTCGCCT  
Yb2\_cDNA\_K326 712 TATGTAATTGCTTTTCTGTTGTTCCTTCTCACATTTGGTTCCTCTGTGGAGCTAGGAATTGCATCTCAGATAACTCGCCT  
Yb2\_cDNA\_TN90 704 TATGTAATTGCTTTTCTGTTGTTCCTTCTCACATTTGGTTCCTCTGTGGAGCTAGGAATTGCATCTCAGATAACTCGCCT

Yb1\_cDNA\_K326 801 TCCTCCTGAGGTAGTTAAGTACTTTACTGATCCAAATGCAATTGAACCACCAGATATGCAGCTTTTATACCCTTTGTGG  
Yb1\_cDNA\_TN90 801 TCCTCCTGAGGTAGTTAAGTACTTTACTGATCCAAATGCAATTGAACCACCAGATATGCAGCTTTTATACCCTTTGTGG  
Yb2\_cDNA\_K326 792 TCCTCCTGAGGTAGTTAAGTACTTTACTGATCCAAATGCAATTGAACCACCAGATATGCAGCTTTTATACCCTTTGTGG  
Yb2\_cDNA\_TN90 784 TCCTCCTGAGGTAGTTAAGTACTTTACTGATCCAAATGCAATTGAACCACCAGATATGCAGCTTTTATACCCTTTGTGG

Yb1\_cDNA\_K326 881 ATTCTGCTTACCCTGGCATATGGTGTGCTGGGTGTGCAGTTATTTTCATGAAATTGGGCATTTTCTGGCTGCTTTCCA  
Yb1\_cDNA\_TN90 881 ATTCTGCTTACCCTGGCATATGGTGTGCTGGGTGTGCAGTTATTTTCATGAAATTGGGCATTTTCTGGCTGCTTTCCA  
Yb2\_cDNA\_K326 872 ATTCTGCTTACCCTGGCATATGGTGTGCTGGGTGTGCAGTTATTTTCATGAAATTGGGCATTTTCTGGCTGCTTTCCA  
Yb2\_cDNA\_TN90 864 ATTCTGCTTACCCTGGCATATGGTGTGCTGGGTGTGCAGTTATTTTCATGAAATTGGGCATTTTCTGGCTGCTTTCCA

Yb1\_cDNA\_K326 961 AGGAATGTGAAATTAAGCATTCTTTCTTTATTCCAAACATCACTCTTGAAGCTTTGGAGCAATCACTCAGTTCAAATC  
Yb1\_cDNA\_TN90 961 AGGAATGTGAAATTAAGCATTCTTTCTTTATTCCAAACATCACTCTTGAAGCTTTGGAGCAATCACTCAGTTCAAATC  
Yb2\_cDNA\_K326 952 AGGAATGTGAAATTAAGCATTCTTTCTTTATTCCAAACATCACTCTTGAAGCTTTGGAGCAATCACTCAGTTCAAATC  
Yb2\_cDNA\_TN90 944 AGGAATGTGAAATTAAGCATTCTTTCTTTATTCCAAACATCACTCTTGAAGCTTTGGAGCAATCACTCAGTTCAAATC

Yb1\_cDNA\_K326 1041 TATTCTTCCGATCGCAAAGCAAAGGTAGACATTTCTCTGCGGGTCCCTTTGCTGGTGTGCATGTCTTCTTCCATGT  
Yb1\_cDNA\_TN90 1041 TATTCTTCCGATCGCAAAGCAAAGGTAGACATTTCTCTGCGGGTCCCTTTGCTGGTGTGCATGTCTTCTTCCATGT  
Yb2\_cDNA\_K326 1032 TATTCTTCCGATCGCAAAGCAAAGGTAGACATTTCTCTGCGGGTCCCTTTGCTGGTGTGCATGTCTTCTTCCATGT  
Yb2\_cDNA\_TN90 1024 TATTCTTCCGATCGCAAAGCAAAGGTAGACATTTCTCTGCGGGTCCCTTTGCTGGTGTGCATGTCTTCTTCCATGT

Yb1\_cDNA\_K326 1121 TTGCGGTTGGCCTGTTACTCTCATCCAATCCTGCTGCTCTGGAGAGTTGGTTTCCAGGTTCTAGCACACTTTCCAGGGC  
Yb1\_cDNA\_TN90 1121 TTGCGGTTGGCCTGTTACTCTCATCCAATCCTGCTGCTCTGGAGAGTTGGTTTCCAGGTTCTAGCACACTTTCCAGGGC  
Yb2\_cDNA\_K326 1112 TTGCGGTTGGCCTGTTACTCTCATCCAATCCTGCTGCTCTGGAGAGTTGGTTTCCAGGTTCTAGCACACTTTCCAGGGC  
Yb2\_cDNA\_TN90 1104 TTGCGGTTGGCCTGTTACTCTCATCCAATCCTGCTGCTCTGGAGAGTTGGTTTCCAGGTTCTAGCACACTTTCCAGGGC

Yb1\_cDNA\_K326 1201 TCTTTGCTTCTCGGGCTTATTAGCAGAGCCACTCTGGTTATGGAGCAATGCATGGTGAATGGTTTCAATCCATCCTCT  
Yb1\_cDNA\_TN90 1201 TCTTTGCTTCTCGGGCTTATTAGCAGAGCCACTCTGGTTATGGAGCAATGCATGGTGAATGGTTTCAATCCATCCTCT  
Yb2\_cDNA\_K326 1192 TCTTTGCTTCTCGGGCTTATTAGCAGAGCCACTCTGGTTATGGAGCAATGCATGGTGAATGGTTTCAATCCATCCTCT  
Yb2\_cDNA\_TN90 1184 TCTTTGCTTCTCGGGCTTATTAGCAGAGCCACTCTGGTTATGGAGCAATGCATGGTGAATGGTTTCAATCCATCCTCT

Yb1\_cDNA\_K326 1281 TGTGATAAGCTGGCTGGTGTGGCTTGACTACATCGGCTTTTAATATGCTCCAGTTGGATGTCTTGATGGTGGGAGAGCTG  
Yb1\_cDNA\_TN90 1281 TGTGATAAGCTGGCTGGTGTGGCTTGACTACATCGGCTTTTAATATGCTCCAGTTGGATGTCTTGATGGTGGGAGAGCTG  
Yb2\_cDNA\_K326 1272 TGTGATAAGCTGGCTGGTGTGGCTTGACTACATCGGCTTTTAATATGCTCCAGTTGGATGTCTTGATGGTGGGAGAGCTG  
Yb2\_cDNA\_TN90 1264 TGTGATAAGCTGGCTGGTGTGGCTTGACTACATCGGCTTTTAATATGCTCCAGTTGGATGTCTTGATGGTGGGAGAGCTG

Yb1\_cDNA\_K326 1361 TGCAGGGAGCCTTTGGGAAAGGATCACTTATTGGTTTTGGTTTTGGCGACATACACACTTCTGGGCTTGGGCGTGTCTGGT  
Yb1\_cDNA\_TN90 1361 TGCAGGGAGCCTTTGGGAAAGGATCACTTATTGGTTTTGGTTTTGGCGACATACACACTTCTGGGCTTGGGCGTGTCTGGT  
Yb2\_cDNA\_K326 1352 TGCAGGGAGCCTTTGGGAAAGGATCACTTATTGGTTTTGGTTTTGGCGACATACACACTTCTGGGCTTGGGCGTGTCTGGT  
Yb2\_cDNA\_TN90 1344 TGCAGGGAGCCTTTGGGAAAGGATCACTTATTGGTTTTGGTTTTGGCGACATACACACTTCTGGGCTTGGGCGTGTCTGGT

Yb1\_cDNA\_K326 1441 GGACCTC-TGTCACCTTCCTGGGGATT-TATGTGCTTATATGTCAGAGGACACC-GAGAAACCATGCTTGAATGATGTAA  
Yb1\_cDNA\_TN90 1441 GGACCTC-TGTCACCTTCCTGGGGATT-TATGTGCTTATATGTCAGAGGACACC-GAGAAACCATGCTTGAATGATGTAA  
Yb2\_cDNA\_K326 1432 GGACCTC-TGTCACCTTCCTGGGGATT-TATGTGCTTATATGTCAGAGGACACC-GAGAAACCATGCTTGAATGATGTAA  
Yb2\_cDNA\_TN90 1424 GGACCTC-TGTCACCTTCCTGGGGATT-TATGTGCTTATATGTCAGAGGACACC-GAGAAACCATGCTTGAATGATGTAA

Yb1\_cDNA\_K326 1520 CAGAGGTCGGAAA-TGGAGAAAAGCAGCTCTTGGTGTGGCTATATTCCTTGTGTATTGACTCTTCTTCCTGTATGGGAT  
Yb1\_cDNA\_TN90 1521 CAGAGGTCGGAAA-TGGAGAAAAGCAGCTCTTGGTGTGGCTATATTCCTTGTGTATTGACTCTTCTTCCTGTATGGGAT  
Yb2\_cDNA\_K326 1511 CAGAGGTCGGAACTTGGAGAAAAGCAGCTCTTGGTGTGGCTATATTCCTTGTGTATTGACTCTTCTTCCTGTATGGGAT  
Yb2\_cDNA\_TN90 1503 CAGAGGTCGGAACTTGGAGAAAAGCAGCTCTTGGTGTGGCTATATTCCTTGTGTATTGACTCTTCTTCCTGTATGGGAT

Yb1\_cDNA\_K326 1600 GAACTTGCAGAAGAAGCTAGGTATAGGTCTTGTAAACAGCTTTTGA  
Yb1\_cDNA\_TN90 1601 GAACTTGCAGAAGAAGCTAGGTATAGGTCTTGTAAACAGCTTTTGA  
Yb2\_cDNA\_K326 1591 GAACTTGCAGAAGAAGCTAGGTATAGGTCTTGTAAACAGCTTTTGA  
Yb2\_cDNA\_TN90 1583 GAACTTGCAGAAGAAGCTAGGTATAGGTCTTGTAAACAGCTTTTGA

**Supplemental Data 6.** cDNA alignments of *Yb* genes. Alignments were generated using Vector-NTI AlignX. Conserved nucleotides are indicated by shaded squares. The mutations in TN 90 which result in the yellow burley phenotype are underlined with solid gray lines.
