# Supplementary material for: A reference genome for Nicotiana tabacum enables map-based cloning of homeologous loci implicated in nitrogen utilization efficiency
Source: PubMed Central journal article supplement (PMC5474855; doi:10.1186/s12864-017-3791-6), 2017-06-19
Supplement: 12864_2017_3791_MOESM7_ESM.pdf [file 12864_2017_3791_MOESM7_ESM.pdf]

```

At EGY1      1  MGLTTSVAFAAAVNRFR-----SFHRENKTTITLPLKQKRLCFSS---IEDSHRFRIAKCLGNDENSNRDD----S
Gr_predEGY1 1  MGLTTSFSEFNAVNRFT----SSSIFRQRWGVQVFGSRKLNTKLICYLIPK-EVSRKFLKFRFCFATNNSNNDADYTON
Vv_predEGY1 1  MGLTTSCSF--STATFRFR--SRPVGNDFRQRIHFNITSRNL----CFLCSKKQVSSCSFGFRFCFSLNNGDK-----N
Nt_Yb2      1  MGLTTSCSF--SIMNRFRINPPVNHFSRRIQIKRMSKRNIG-RLIIRC-----SSGNG-----SSNNGSS-----S
Nt_Yb1      1  MGLTTSCSF--SSMNRFRINPPVNYTFSRRIQIKRMSKRNIG-RLIIRCSSGSSGNG-----SSNDGSS-----S
Sl_L2       1  MGLTTSCSF--SIMNRFRINPPISCKFSRRIQIKRMSKRSIG-RLIISCSGSSGGGGG-----SSNDGSS-----N
St_predEGY1 1  MGLTTSCSF--SIMNRFRINPPISCFNFSRRIQIKRMSKRSIG-D-RLIISCS--SSGGGGG-----SSNDGSS-----N

At_EGY1     68  IGENETHKSSVVKTATFEEDETSRSSTTSSENFGSKIS-----F--STIDPTVSSFOIDSFKLMELLGPEK
Gr_predEGY1 75  DGE----KEDSSNTASSTFSTVVTASPPEDKAVQEKRTSNLPPS--ISSRFPNIAPLGSVYNDFOIDSFKLMELLGPEK
Vv_predEGY1 69  GGESSLKDSNSKTATPEEAE-----ELDSKDFPAPVSSRFPISIPGPGYNNFOVDSFKLMELLGPEK
Nt_Yb2      62  DGK----LEKDSSNLATVTEETTE-ERNGGGGASGVENDSDSPVS-ISSR-PTISTVGSTYNNFOVDSFKLMELLGPEK
Nt_Yb1      65  DGK----LEKDSSNLATVTEETTE-ERNGGGGASGVENDSDSPVS-ISSR-PTISTVGSTYNNFOVDSFKLMELLGPEK
Sl_L2       69  DRK----LEKDSSNLATVTEETAG-ERNSGGEAS-----DSEDSSVS-ISSR-PTISTVGSTYNNFOVDSFKLMELLGPEK
St_predEGY1 67  DGK----LEKDSSNLATVTEETA-ERNSGGEAS-----DSEDSSVS-ISSR-PTISTVGSTYNNFOVDSFKLMELLGPEK

At_EGY1     139 VDPADVKLIKDKLFGYSTFWVTKEEPPFGDLGEGILFLGNLRGKREDVFAKLQSKLVEVASDKYNLFMVEEPNSEGPDPRG
Gr_predEGY1 150 VDPADVKLIKDKLFGYSTFWVTKEEPPFGDLGEGILFLGNLRGKREDVFAKLQQLAEIIGDKYNLFMVEEPPDSEADPRG
Vv_predEGY1 137 VDPADVKLIKDKLFGYSTFWVTKEEPPFGDLGEGILFLGNLRGKREDVFAKLQSQLSEIMGDKYNLFMVEEPPNSGADPRG
Nt_Yb2      135 VDPADVKLIKDKLFGYSTFWVTKEEPPFGDLGEGILFLGNLRGKREDVFAKLQSQLSEIMGDKYNLFMVEEPPNSEGPDPRG
Nt_Yb1      138 VDPADVKLIKDKLFGYSTFWVTKEEPPFGDLGEGILFLGNLRGKREDVFAKLQSQLSEIMGDKYNLFMVEEPPNSEGPDPRG
Sl_L2       138 VDPADVKLIKDKLFGYSTFWVTKEEPPFGDLGEGILFLGNLRGKREDVFAKLQSQLSEIMGDKYNLFMVEEPPNSEGPDPRG
St_predEGY1 136 VDPADVKLIKDKLFGYSTFWVTKEEPPFGDLGEGILFLGNLRGKSEDFVFAKLQSQLSEIMGDKYNLFMVEEPPNSEGPDPRG

At_EGY1     219 GARVSGLRKEVSEPGPTTLWQYVIALLFLFLTIGSSVELGIASQINRLPPEVVKYFTDPNAIEPPDMQLLFPVDSAL
Gr_predEGY1 230 GPRVSGLRKEVSEPGPTTLWQYVIALLFLFLTIGSSVELGIASQINRLPPEVVKYFTDPNAVIEPPDMQLLFPVDSAL
Vv_predEGY1 217 GPRVSGMLRKEVSEPGPTTLWQYVIAFLFLFLTIGSSVELGIASQINRLPPEVVKYFTDPNAIEPPDMQLLFPVDSAL
Nt_Yb2      215 GPRVSGMLRKEVSEPGPTTLWQYVIAFLFLFLTIGSSVELGIASQITRLPPEVVKYFTDPNAIEPPDMQLLFPVDSAL
Nt_Yb1      218 GPRVSGMLRKEVSEPGPTTLWQYVIAFLFLFLTIGSSVELGIASQITRLPPEVVKYFTDPNAIEPPDMQLLFPVDSAL
Sl_L2       218 GPRVSGMLRKEVSEPGPTTLWQYVIAFLFLFLTIGSSVELGIASQITRLPPEVVKYFTDPNAIEPPDMQLLFPVDSAL
St_predEGY1 216 GPRVSGMLRKEVSEPGPTTLWQYVIAFLFLFLTIGSSVELGIASQITRLPPEVVKYFTDPNAIEPPDMQLLFPVDSAL

At_EGY1     299 PLAYGVLGVLFLFHEIGHFLAAFPKVKLSIPYFIPNITLGSFGAITQFKSILPDRSTKVDISLAGPFAGAALSVMFAVG
Gr_predEGY1 310 PLAYGVLGVLFLFHEIGHFLAAFPKVKLSIPYFIPNITLGSFGAITQFKSILPDRSTQVDISLAGPFAGAALSVMFAVG
Vv_predEGY1 297 PLAYGVLGVLFLFHEIGHFLAAFPKVKLSIPYFIPNITLGSFGAITQFKSILPDRSTKVDISLAGPFAGAALSVMFAVG
Nt_Yb2      295 PLAYGVLGVLFLFHEIGHFLAAFPKVKLSIPYFIPNITLGSFGAITQFKSILPDRKAKVDISLAGPFAGAALSVMFAVG
Nt_Yb1      298 PLAYGVLGVLFLFHEIGHFLAAFPKVKLSIPYFIPNITLGSFGAITQFKSILPDRKAKVDISLAGPFAGAALSVMFAVG
Sl_L2       298 PLAYGVLGVLFLFHEIGHFLAAFPKVKLSIPYFIPNITLGSFGAITQFKSILPDRKAKVDISLAGPFAGAALSVMFAVG
St_predEGY1 296 PLAYGVLGVLFLFHEIGHFLAAFPKVKLSIPYFIPNITLGSFGAITQFKSILPDRKAKVDISLAGPFAGAALSVMFAVG

At_EGY1     379 LFLSNPEPDAANDLVQVPSMLFQGSLLLGLISRATLGYAAMHAATVSIHPLVIAGWCGLTTSAFNMLPVGCLDGGRAVQGA
Gr_predEGY1 390 LLLSSNPDAAGDLVQVPSMLFQGSLLLGLISRATLGYAAMHAATVSIHPLVIAGWCGLTTSAFNMLPVGCLDGGRAVQGA
Vv_predEGY1 377 LLLSSNPDAAGDLVQVPSMLFQGSLLLGLISRATLGYAAMHAATVSIHPLVIAGWCGLTTSAFNMLPVGCLDGGRAVQGA
Nt_Yb2      375 LLLSSNPDAAGDLVQVPSMLFQGSLLLGLISRATLGYAAMHAATVSIHPLVIAGWCGLTTSAFNMLPVGCLDGGRAVQGA
Nt_Yb1      378 LLLSSNPDAAGDLVQVPSMLFQGSLLLGLISRATLGYAAMHAATVSIHPLVIAGWCGLTTSAFNMLPVGCLDGGRAVQGA
Sl_L2       378 LLLSSNPDAAGDLVQVPSMLFQGSLLLGLISRATLGYAAMHAATVSIHPLVIAGWCGLTTSAFNMLPVGCLDGGRAVQGA
St_predEGY1 376 LLLSSNPDAAGDLVQVPSMLFQGSLLLGLISRATLGYAAMHAATVSIHPLVIAGWCGLTTSAFNMLPVGCLDGGRAVQGA

At_EGY1     459 FGKNSLVTFGLSTYVVLGLRVLGGPLALPWGLYLVLICQRTPEKPCLNADVTEVGTWRKALVVAIFLVVLTLLPVWDELAE
Gr_predEGY1 470 YGKCALVGFGLTITYTLLGLGVVGGPLSLPWGLYLVLICQRTPEKPCLNADVTEVGTWRKALVVAIFLVVLTLLPVWDELAE
Vv_predEGY1 457 FGKCALVGFGLTITYTLLGLGVVGGPLSLPWGLYLVLICQRTPEKPCLNADVTEVGTWRKALVVAIFLVVLTLLPVWDELAE
Nt_Yb2      455 FGKSLVGFGLATYTLGLGLVGGPLSLPWGLYLVLICQRTPEKPCLNADVTEVGTWRKALVVAIFLVVLTLLPVWDELAE
Nt_Yb1      458 FGKSLVGFGLATYTLGLGLVGGPLSLPWGLYLVLICQRTPEKPCLNADVTEVGTWRKALVVAIFLVVLTLLPVWDELAE
Sl_L2       458 FGKSLVGFGLATYTLGLGLVGGPLSLPWGLYLVLICQRTPEKPCLNADVTEVGTWRKALVVAIFLVVLTLLPVWDELAE
St_predEGY1 456 FGKSLVGFGLATYTLGLGLVGGPLSLPWGLYLVLICQRTPEKPCLNADVTEVGTWRKALVVAIFLVVLTLLPVWDELAE

At_EGY1     539 ELGIGLVTTF
Gr_predEGY1 550 ELGIGLVTF
Vv_predEGY1 537 ELGIGLVTTF
Nt_Yb2      535 ELGIGLVTF
Nt_Yb1      538 ELGIGLVTF
Sl_L2       538 ELGIGLVTTF
St_predEGY1 536 ELGIGLVTTF

```

Amino acid alignments of Yb related proteins. Alignments were generated using MUSCLE. Conserved nucleotides are indicated by shaded squares. The three conserved domains, GNLR, HEXXH, and NPDG are underlined with black lines. Accession numbers are as follows: *Arabidopsis* EGY1 (NP\_198372), *Gossypium raimondii* predicted EGY1 (XP\_012492480), *Vitis vinifera* predicted EGY1 (XP\_002269447), *S. lycopersicum* L2 (NP\_001299816), *S. tuberosum* predicted EGY1 (XP\_006339202).

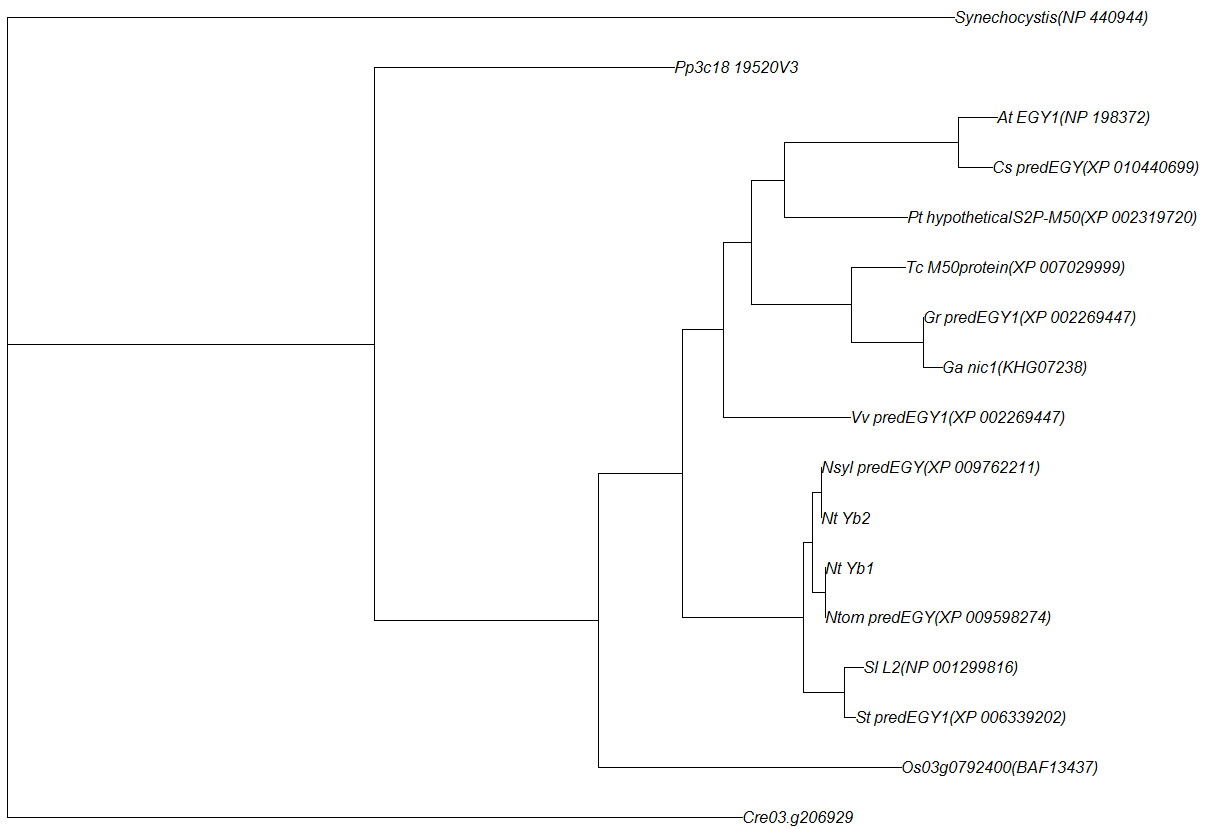

Phylogeny of Yb<sub>1</sub> and Yb<sub>2</sub> related proteins. The dendrogram was constructed using the maximum likelihood method. GenBank accession number are given for each branch except for the Cre03.g206929 and Pp3c18\_19520V3, which are based on annotations of the *Chlamydomonas reinhardtii* and *Physcomitrella patens* genomes available through the Phytozome database ([www.phytozome.net](http://www.phytozome.net)).
