# Supplementary material for: A reference genome for Nicotiana tabacum enables map-based cloning of homeologous loci implicated in nitrogen utilization efficiency
Source: PubMed Central journal article supplement (PMC5474855; doi:10.1186/s12864-017-3791-6), 2017-06-19
Supplement: 12864_2017_3791_MOESM9_ESM.pdf [file 12864_2017_3791_MOESM9_ESM.pdf]

**Supplementary Data 8.** Genotypic survey of tobacco cultivars from different market classes. for the *Yb* loci.

| Line            | Market class <sup>1</sup> | Accession Number <sup>2</sup> | TC Number <sup>3</sup> | Stem Color | <i>YB1</i> Genotype <sup>4</sup> | <i>YB2</i> Genotype <sup>5</sup> |
|-----------------|---------------------------|-------------------------------|------------------------|------------|----------------------------------|----------------------------------|
| Posey           | Maryland                  | PI 552743                     | 512                    | Green      | <i>YB1</i>                       | <i>YB2</i>                       |
| Catterton       | Maryland                  | PI 551332                     | 494                    | Green      | <i>YB1</i>                       | <i>YB2</i>                       |
| Green Brior     | Burley                    | PI 552645                     | 40                     | Green      | <i>YB1</i>                       | <i>YB2</i>                       |
| Gertz           | Maryland                  | PI 552641                     | 496                    | Green      | <i>YB1</i>                       | <i>YB2</i>                       |
| Sweeney         | Maryland                  | PI 552762                     | 514                    | Green      | <i>YB1</i>                       | <i>YB2</i>                       |
| Moore           | Maryland                  | PI 552703                     | 511                    | Green      | <i>YB1</i>                       | <i>YB2</i>                       |
| Wilson          | Maryland                  | PI 551341                     | 517                    | Green      | <i>YB1</i>                       | <i>yb2</i>                       |
| Md 10           | Maryland                  | PI 551333                     | 498                    | Green      | <i>YB1</i>                       | <i>yb2</i>                       |
| Md 59           | Maryland                  | PI 552451                     | 501                    | Green      | <i>YB1</i>                       | <i>yb2</i>                       |
| Md 64           | Maryland                  | PI 551334                     | 502                    | Green      | <i>YB1</i>                       | <i>yb2</i>                       |
| Md 609          | Maryland                  | PI 552452                     | 505                    | Green      | <i>YB1</i>                       | <i>yb2</i>                       |
| Barnett Special | Burley                    | PI 552589                     | 1                      | White      | <i>yb1</i>                       | <i>yb2</i>                       |
| Judy's Pride    | Burley                    | PI 552483                     | 49                     | White      | <i>yb1</i>                       | <i>yb2</i>                       |
| Kelly Brownleaf | Burley                    | PI 552670                     | 50                     | White      | <i>yb1</i>                       | <i>yb2</i>                       |
| Kelly Burley    | Burley                    | PI 552671                     | 51                     | White      | <i>yb1</i>                       | <i>yb2</i>                       |
| Burley 1        | Burley                    | PI 552360                     | 3                      | White      | <i>yb1</i>                       | <i>yb2</i>                       |
| Burley 2        | Burley                    | PI 552361                     | 4                      | White      | <i>yb1</i>                       | <i>yb2</i>                       |
| Burley 11A      | Burley                    | PI 552362                     | 5                      | White      | <i>yb1</i>                       | <i>yb2</i>                       |
| Burley 21       | Burley                    | PI 552363                     | 7                      | White      | <i>yb1</i>                       | <i>yb2</i>                       |
| Ky 1            | Burley                    | PI 552673                     | 52                     | White      | <i>yb1</i>                       | <i>yb2</i>                       |
| Ky 5            | Burley                    | PI 551278                     | 53                     | White      | <i>yb1</i>                       | <i>yb2</i>                       |
| Ky 9            | Burley                    | PI 552365                     | 54                     | White      | <i>yb1</i>                       | <i>yb2</i>                       |
| Ky 14           | Burley                    | PI 552477                     | 57                     | White      | <i>yb1</i>                       | <i>yb2</i>                       |
| Ky 16           | Burley                    | PI 552366                     | 59                     | White      | <i>yb1</i>                       | <i>yb2</i>                       |

<sup>1</sup> According to USDA GRIN database

<sup>2</sup> USDA GRIN database

<sup>3</sup> 'TC' indicates Tobacco Cultivar in the United States *Nicotiana* Germplasm Collection.

<sup>4</sup> Determined by testing for for 1 bp insertion discovered in burley tobacco cultivar TN 90.

<sup>5</sup> Determined by testing for for 8 bp deletion mutation discovered in burley tobacco cultivar TN 90.
