# Supplementary material for: A reference genome for Nicotiana tabacum enables map-based cloning of homeologous loci implicated in nitrogen utilization efficiency
Source: PubMed Central journal article supplement (PMC5474855; doi:10.1186/s12864-017-3791-6), 2017-06-19
Supplement: 12864_2017_3791_MOESM10_ESM.pdf [file 12864_2017_3791_MOESM10_ESM.pdf]

## Supplementary Data 10 – Tobacco Genome sequence data

### NGS Assembly

| Sequence Class        | No. reads            | No. bases              | Depth*       | Genbank accession numbers (SRA)                                                                            |
|-----------------------|----------------------|------------------------|--------------|------------------------------------------------------------------------------------------------------------|
| 454 SG                | 64,356,541           | 23,232,283,876         | 5.16         | SRR5275650 – SRR5275754                                                                                    |
| 454 SG XL             | 52,901,706           | 32,780,428,773         | 7.28         | SRR5275610 – SRR5275649                                                                                    |
| 454 PE3               | 35,783,818           | 10,877,165,346         | 2.42         | SRR5275795 – SRR5275866                                                                                    |
| 454 PE8               | 20,303,227           | 5,910,090,732          | 1.31         | SRR5275755 – SRR5275794                                                                                    |
| 454 PE20              | 18,783,288           | 5,766,515,000          | 1.28         | SRR5275867 – SRR5275892                                                                                    |
| <b>454 Total</b>      | <b>192,128,580</b>   | <b>78,566,483,727</b>  | <b>17.46</b> |                                                                                                            |
| PE 300bp              | 1,091,120,572        | 109,112,057,200        | 24.25        | SRR5277616, SRR5277617, SRR5277619, SRR5277622, SRR5277624, SRR5277625, SRR5277628, SRR5277629, SRR5277631 |
| MP 2kbp               | 160,849,530          | 16,245,802,530         | 3.61         | SRR5277613                                                                                                 |
| MP 8kbp               | 1,008,919,040        | 98,874,065,920         | 21.97        | SRR5277607, SRR5277609, SRR5277611                                                                         |
| <b>Illumina Total</b> | <b>2,471,801,010</b> | <b>308,564,924,377</b> | <b>68.57</b> |                                                                                                            |
| <b>Grand Total</b>    |                      | <b>387,131,408,104</b> | <b>86.03</b> |                                                                                                            |

Table showing the number of reads and total bases of each class that were included in the tobacco genome assembly. Note that the Roche 454 data represents raw sequence reads and the Illumina data represents filtered sequence reads (See methods).

\* Depth was calculated based on an estimated genome size of 4.5Gbp.
