# Supplementary material for: A reference genome for Nicotiana tabacum enables map-based cloning of homeologous loci implicated in nitrogen utilization efficiency
Source: PubMed Central journal article supplement (PMC5474855; doi:10.1186/s12864-017-3791-6), 2017-06-19
Supplement: 12864_2017_3791_MOESM11_ESM.pdf [file 12864_2017_3791_MOESM11_ESM.pdf]

**Table A – KASP design regions for *yb1 yb2* fine mapping**

| Marker name | DNA sequence                                                                                                                                                                                   |
|-------------|------------------------------------------------------------------------------------------------------------------------------------------------------------------------------------------------|
| Yb5-1       | TTAATAATAGTTCCTTTTTGACCGCGGGTACGAGGGCTAGCGTGAAATTGGCCACGAAGT[T/C]<br>]TGCCTAGATTTGAGACTTAATAGACGTTCCGGGGTTGATACTCAATGTCGTACCTACTAAT                                                            |
| Yb5-4       | GACTACTATCATTGCCAGTCTCAACCTGTTCTGGTTCAAGCTTCAGTTCACGTCCTCTC[T/C]A<br>TCAGTCTCTGCAGGCTCAACTGTTTCGATCTCCTTGTGTTCTGGAACCTCTTTAGAATC                                                               |
| Yb24-1      | TAGATATTTGCCTCTTGTAGCTGGTTTACCATTTATAAAGCTTTTTTCTGTTGCCGCAT[A/G]A<br>TGAAGTGAATGTTGTCTCTATTATCTGTTAAAGACTTGTGATGTAGCTTGGTGTCTG                                                                 |
| Yb24-2      | GAATCCTATGCTGGGATTAAGCCAAGCTGGTTTAGCTGCATCGGGATTTAATCCTTCGTT[T/C]<br>GTGGGGATTGGTGCTGGTTATGATATAAATAGCATTAAATCCGGGCGTTTTAGGTAGTAGT                                                             |
| Yb24-4      | GTGGAATCTAAGGAGGGTAAAGTGAAGCAAGTTTATCCTTGTCTAGAAAGGTAGAGAT[A/<br>G]TTGTTTCCGATAGATCCTTGGCTAAAAAACGCAGAAAAGAAGCAGTGTCAACAAGTAAT                                                                 |
| Yb24-6      | GCAATATAAAAGTCAATACTAGTCTTAACGGTGTGAGGCCTTTTGGAAAACCTGTACGG[T/G]<br>]CTTGGTCCAAAACAGACAATATCACACCATTTAAGAGTATCTTTAGGCCGTTTTAGTCCG                                                              |
| Yb24-7      | GACGGTATGGTTAAAGATGTATATACGGAAGACTTCTCGATCACCATCGGAGAGAAATGC[T/<br>G]TATTTTTATGTCTCTTTTGGCCCAATGGAGAGCCCTTATTATAAATGTAGAAGATTGAA                                                               |
| EGY_2kasp   | GCTTAGTGTGCAAATTGTACAGTCACTTAAAACATTCTGTTTGTGCTGCTATCAGCTTGGTGG<br>ACCTCT[T/]GTCACCTCCTTGGGGATTGTATGTGCTTATATGTCAGGTAATAAAAATACATTGC<br>TTTATGAAGTATTATGCTTGTGTAATAATATCGCCGTCCTATTTTCATGGTATA |

**Table B – Oligonucleotides used for map-based identification of yb1 yb2 genomic DNA and cDNA**

| <b>Task</b>                                                    | <b>Oligonucleotides Used</b>             |
|----------------------------------------------------------------|------------------------------------------|
| Genotyping of EGY1 deletion                                    | EGY_1-F/EGY_1-R                          |
| Genotyping of EGY1 homeolog insertion                          | EGY_2-nF/EGY_2-nR followed by EGY_2-kasp |
| Amplification of Yb1 cDNA                                      | cYb-F/cYb-R                              |
| Amplification of Yb2 cDNA                                      | cYb-F/cYb-R                              |
| Amplification of Yb2 genomic fragment 1                        | gYb2-F1/gYb2-R1                          |
| Internal sequencing of Yb2 genomic fragment 1                  | gYb2_Int1                                |
| Amplification of Yb2 genomic fragment 2                        | gYb2-F2/gYb2-R2                          |
| Amplification of Yb2 genomic fragment 3                        | gYb2-F3/gYb2-R3                          |
| Internal sequencing of Yb2 genomic fragment 3                  | gYb2-Int3                                |
| Amplification of Yb2 genomic fragment 4                        | gYb2-F4/gYb2-R4                          |
| Amplification of Yb2 genomic fragment 5                        | gYb2-F5/gYb2-R5                          |
| Amplification of Yb2 genomic fragment 6                        | gYb2-F6/gYb2-R6                          |
| Amplification of Yb1 genomic fragment 1                        | gYb1-F1/gYb1-R1                          |
| Internal sequencing of Yb1 genomic fragment 1                  | gYb1-Int1                                |
| Amplification of Yb1 genomic fragment 2                        | gYb1-F2/gYb1-R2                          |
| Amplification of Yb1 genomic fragment 3                        | gYb1-F3/gYb1-R3                          |
| Amplification of Yb1 genomic fragment 4                        | gYb1-F4/gYb1-R4                          |
| Amplification of Yb1 genomic fragment 5                        | gYb1-F5/gYb1-R5                          |
| Internal sequencing of Yb1 genomic fragment 5                  | gYb1-Int5                                |
| Amplification of Yb1 genomic fragment 6                        | gYb1-F6/gYb1-R6                          |
| Internal sequencing of Yb1 genomic fragment 6                  | gYb1-Int6                                |
| Amplification of CRISPR/Cas Yb2 target site 1                  | gYb2-F1/gYb2-R1                          |
| Sequencing of CRISPR/Cas Yb2 target site 1                     | gYb2-F1                                  |
| Amplification of CRISPR/Cas Yb2 target site 2                  | gYb2-F1/gYb2-R2                          |
| Sequencing of CRISPR/Cas Yb2 target site 2                     | gYb2-CC2                                 |
| Amplification of CRISPR/Cas Yb1 target site 1                  | gYb1-F1/gYb1-R2                          |
| Sequencing of CRISPR/Cas Yb1 target site 1                     | gYb1-Int1                                |
| Amplification of CRISPR/Cas Yb1 target site 2                  | gYb1-F1/gYb1-R1                          |
| Sequencing of CRISPR/Cas Yb1 target site 2                     | gYb1-F1                                  |
| Amplification of fragment with Yb2 deletion in Maryland lines  | gYb2-F2/gYb2-R2                          |
| Sequencing of Yb2 deletion fragment in Maryland lines          | gYb2-F2                                  |
| Amplification of fragment with Yb1 insertion in Maryland lines | gYb1-F6/gYb1-R6                          |
| Sequencing of Yb1 insertion fragment in Maryland lines         | gYb1-6                                   |

**Table C – Oligonucleotide sequences used in map-based cloning of yb1 and yb2 genomic DNA and cDNA**

| Primer Name | Primer Sequence (in 5' to 3' direction)    |
|-------------|--------------------------------------------|
| EGY1-F      | AAGAGTAGCTGCATGATGTGAAGA                   |
| EGY1-R      | CTGGCCCTCTGAATTAGGTTCCCTC                  |
| EGY2-nF     | GCAATCGTTGTCCAGTGTCTA                      |
| EGY2-nR     | TTCCGACCTCTGTTACATCA                       |
| cYb-F       | ATGGGAACGCTAACGAGCTGCAGTTTCAGCACAATGAAT    |
| cYb-R       | TCAAAAGCTGGTTACAAGACCTATACCTAGTTCTTCTGCAAG |
| gYb2-F1     | ATGGGAACGCTAACGAGCTGCAGTTTCAGCA            |
| gYb2-R1     | CCGTGGATATTGTTGGCTGCCAAGAAATT              |
| gYb2-Int1   | CCGGTGTCAATTTCTTCCAGA                      |
| gYb2-F2     | AAGGTTGATCCCAGTGATGTGAAGATA                |
| gYb2-R2     | CCAACACACCATATGCCAGTGGTAT                  |
| gYb2-F3     | CCGTTTGTGGATTCTGCTATACCAC                  |
| gYb2-R3     | GGAATGCTTAATTTACATTCTTGGAAAC               |
| gYb2-Int3   | CTGATTTAGCTATGCTAGTTTGC                    |
| gYb2-F4     | GAAATTGGGCATTTTCTGGCTGCG                   |
| gYb2-R4     | GCAAAAAGGACCCACAAGCGAAATA                  |
| gYb2-F5     | CGAAAAGCAAAGGTAGATATTTTCGCTTGT             |
| gYb2-R5     | CCAATAAGTGATCCTTTCCCAAAGGC                 |
| gYb2-F6     | GCCTTTGGGAAAGGATCACTTATTGG                 |
| gYb2-R6     | CCACTACGTACAGTCAAAGATCAGTATGAA             |
| gYb1-F1     | CCTCACCATCTTCCAATTACATTTTTCACCATTG         |
| gYb1-R1     | CACATTCAGTACATTGGTTTCTCATCTTCATCTG         |
| gYb1-Int1   | AAGAAGCTCGTCACATGCATTC                     |
| gYb1-F2     | AAGGTTGATCCCAGTGATGTGAAGTTC                |
| gYb1-R2     | CCAACACACCATATGCCAACGGTAA                  |
| gYb1-F3     | CCGTTTGTGGATTCTGCTTTACCGT                  |
| gYb1-R3     | GGAATGCTTAATTTACATTCTTGGAAAT               |
| gYb1-F4     | GAAATTGGGCATTTTCTGGCTGCA                   |
| gYb1-R4     | GCAAAAAGGACCCGCAAGAGAAATG                  |
| gYb1-F5     | CGAAAAGCAAAGGTAGACATTTCTCTTGC              |
| gYb1-R5     | GGTGTCCAATTTCCCTAGCCG                      |
| gYb1-Int5   | GGTTTCAATCCATCCTCTTGTGAT                   |
| gYb1-F6     | CGGCTAGGGAAATTGGACACC                      |
| gYb1-R6     | CCACTACGTACAGTCAAAGATCAGTATGAT             |
| gYb1-Int6   | CTCCGCCATCAAACACCGA                        |
| gYb2-CC2    | GGTTTAAAAGAATTGTGGCTGGGGTA                 |
